# Supplementary material for: New Pharmacokinetic and Microbiological Prediction Equations to Be Used as Models for the Search of Antibacterial Drugs
Source: MDPI journal article supplement (doi:10.3390/ph15020122), 2022-01-20

# New Pharmacokinetic and Microbiological Prediction Equations to Be Used as Models for the Search of Antibacterial Drugs

Jose I. Bueso-Bordils <sup>1,\*</sup>, Gerardo M. Antón-Fos <sup>1</sup>, Antonio Falcó <sup>2</sup>, Maria J. Duarte <sup>1</sup>, Rafael Martín-Algarra <sup>1</sup> and Pedro A. Alemán-López <sup>1</sup>

<sup>1</sup> Departamento de Farmacia, Universidad Cardenal Herrera-CEU, CEU Universities C/Ramón y Cajal s/n, Alfara del Patriarca, 46115 Valencia, Spain; ganton@uchceu.es (G.M.A.-F.); mduart@uchceu.es (M.J.D.); rmartin@uchceu.es (R.M.-A.); paleman@uchceu.es (P.A.A.-L.)

<sup>2</sup> ESI International Chair@CEU-UCH, Departamento de Matemáticas, Física y Ciencias Tecnológicas, Universidad Cardenal Herrera-CEU, CEU Universities San Bartolomé 55, Alfara del Patriarca, 46115 Valencia, Spain; afalco@uchceu.es

\* Correspondence: jose.bueso@uchceu.es; Tel.: +34-96-136-9000

## Supplementary Section S1: Internal validation results for each of the selected equations

**Table S1.** Standard error (SE) and significance (p) of the indices used in the equation RF<sub>CL</sub>.

| Index           | SE      | p     |
|-----------------|---------|-------|
| ${}^6\chi_{ch}$ | 441.367 | 0.007 |
| $S_{>N-}$       | 17.6114 | 0.000 |
| $NI_2$          | 278.522 | 0.000 |

**Table S2.** Correlations of the estimates of the regression coefficients of the indices used in the equation RF<sub>CL</sub>.

| Index           | ${}^6\chi_{ch}$ | $S_{>N-}$ | $NI_2$ |
|-----------------|-----------------|-----------|--------|
| ${}^6\chi_{ch}$ | 1.000           |           |        |
| $S_{>N-}$       | -0.316          | 1.000     |        |
| $NI_2$          | -0.408          | 0.510     | 1.000  |

**Figure S1.** Residual values (res) versus cross-validated residual values (res(cv)) in the equation RF<sub>CL</sub>.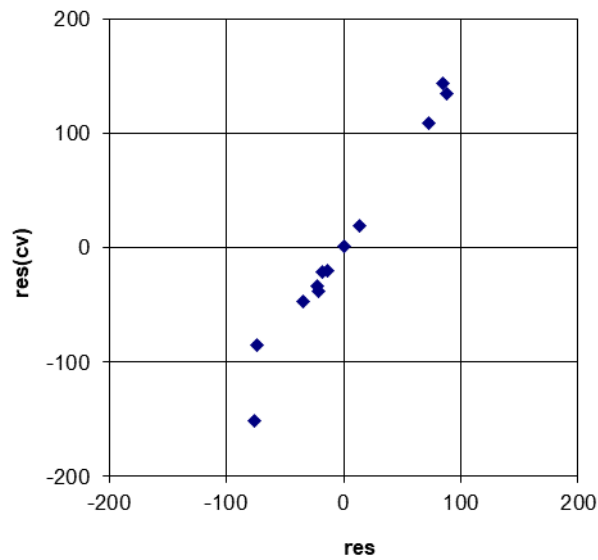**Figure S2.** Correlation coefficient (r2) versus prediction coefficient (r2(vc)) in the equation RF<sub>CL</sub>.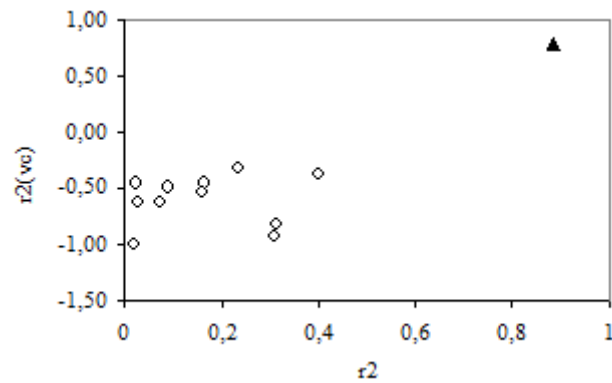

**Table S3.** Standard error (SE) and significance (p) of the indices used in the equation  $RF_{MIC50Ea}$ .

| Index      | SE         | p     |
|------------|------------|-------|
| $S_{CH2-}$ | 0.0139545  | 0.000 |
| $S_{>N-}$  | 0.00827706 | 0.000 |
| $S_{-NH-}$ | 0.00688546 | 0.000 |

**Table S4.** Correlations of the estimates of the regression coefficients of the indices used in the equation  $RF_{MIC50Ea}$ .

| Index      | $S_{CH2-}$ | $S_{aCa}$ | $S_{-NH-}$ |
|------------|------------|-----------|------------|
| $S_{CH2-}$ | 1.000      |           |            |
| $S_{aCa}$  | -0.752     | 1.000     |            |
| $S_{-NH-}$ | -0.531     | 0.355     | 1.000      |

**Figure S3.** Residual values (res) versus cross-validated residual values (res(cv)) in the equation  $RF_{MIC50Ea}$ .

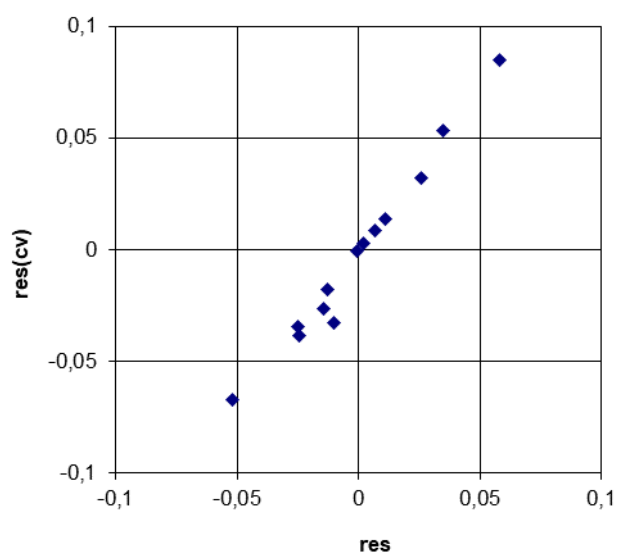

**Figure S4.** Correlation coefficient ( $r^2$ ) versus prediction coefficient ( $r^2(vc)$ ) in the equation  $RF_{MIC50Ea}$ .

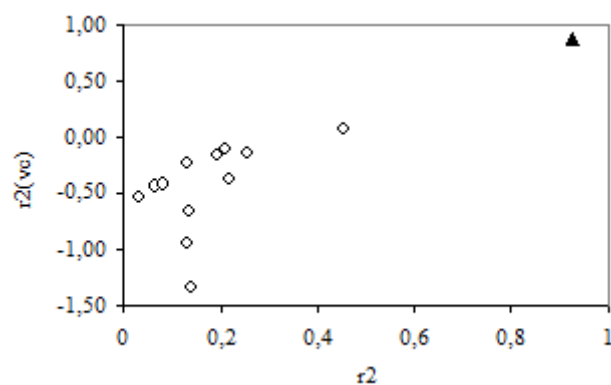

**Table S5.** Standard error (SE) and significance (p) of the indices used in the equation RF<sub>MIC50Pm</sub>.

| Index.           | SE        | p     |
|------------------|-----------|-------|
| ${}^9\chi'_{ch}$ | 5.78657   | 0.000 |
| $S_{>N-}$        | 0.0128396 | 0.000 |
| $S_{-NH-}$       | 0.0181043 | 0.000 |

**Table S6.** Correlations of the estimates of the regression coefficients of the indices used in the equation RF<sub>MIC50Pm</sub>.

| Index.           | ${}^9\chi'_{ch}$ | $S_{-CH3}$ | $S_{>N-}$ |
|------------------|------------------|------------|-----------|
| ${}^9\chi'_{ch}$ | 1.000            |            |           |
| $S_{-CH3}$       | 0.047            | 1.000      |           |
| $S_{>N-}$        | 0.069            | -0.220     | 1.000     |

**Figure S5.** Residual values (res) versus cross-validated residual values (res(cv)) in the equation RF<sub>MIC50Pm</sub>.

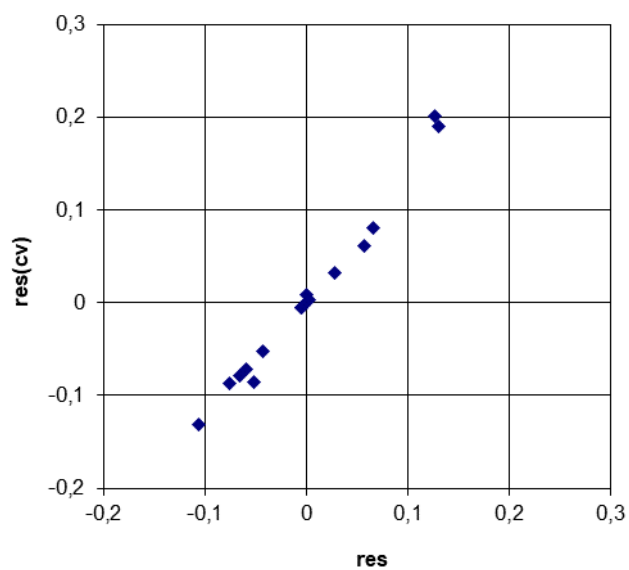

**Figure S6.** Correlation coefficient (r2) versus prediction coefficient (r2(vc)) in the equation RF<sub>MIC50Pm</sub>.

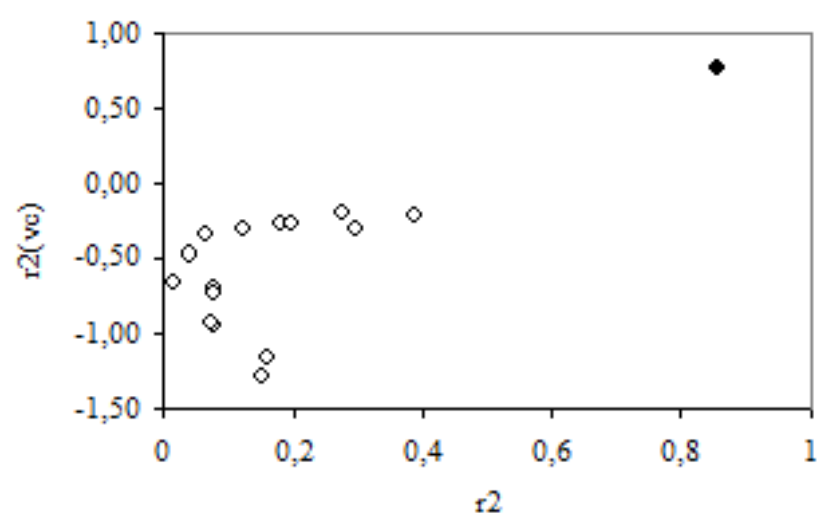

Supplement: s1 [file s1]
