# Supplementary material for: New Pharmacokinetic and Microbiological Prediction Equations to Be Used as Models for the Search of Antibacterial Drugs
Source: MDPI journal article supplement (doi:10.3390/ph15020122), 2022-01-20
Supplement: s1 [file s1]

# New Pharmacokinetic and Microbiological Prediction Equations to Be Used as Models for the Search of Antibacterial Drugs

Jose I. Bueso-Bordils <sup>1,\*</sup>, Gerardo M. Antón-Fos <sup>1</sup>, Antonio Falcó <sup>2</sup>, Maria J. Duarte <sup>1</sup>, Rafael Martín-Algarra <sup>1</sup> and Pedro A. Alemán-López <sup>1</sup>

<sup>1</sup> Departamento de Farmacia, Universidad Cardenal Herrera-CEU, CEU Universities C/Ramón y Cajal s/n, Alfara del Patriarca, 46115 Valencia, Spain; ganton@uchceu.es (G.M.A.-F.); mduart@uchceu.es (M.J.D.); rmartin@uchceu.es (R.M.-A.); paleman@uchceu.es (P.A.A.-L.)

<sup>2</sup> ESI International Chair@CEU-UCH, Departamento de Matemáticas, Física y Ciencias Tecnológicas, Universidad Cardenal Herrera-CEU, CEU Universities San Bartolomé 55, Alfara del Patriarca, 46115 Valencia, Spain; afalco@uchceu.es

\* Correspondence: jose.bueso@uchceu.es; Tel.: +34-96-136-9000

**Supplementary Section S2: Compounds used in the realization of the equations: molecule name/code, IUPAC name & structure and bibliographic references about activity for each compound.**

| Paper name/code | IUPAC name & structure                                                                                                                                                                                     | References                                                                                                                                                                                                                                                                                                                                                                                                                                                                                                                                                                                                                                                                                                                                                                                                                                                                                                             |
|-----------------|------------------------------------------------------------------------------------------------------------------------------------------------------------------------------------------------------------|------------------------------------------------------------------------------------------------------------------------------------------------------------------------------------------------------------------------------------------------------------------------------------------------------------------------------------------------------------------------------------------------------------------------------------------------------------------------------------------------------------------------------------------------------------------------------------------------------------------------------------------------------------------------------------------------------------------------------------------------------------------------------------------------------------------------------------------------------------------------------------------------------------------------|
| A-80556         | 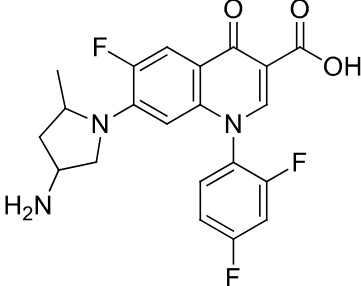 <p>7-(4-amino-2-methylpyrrolidin-1-yl)-1-(2,4-difluorophenyl)-6-fluoro-4-oxo-1,4-dihydroquinoline-3-carboxylic acid</p>  | <p>Clement, J.J.; Tanaka, S.K.; Alder, J.; Vojtko, C.; Beyer, J.; Hensey, D.; Ramer, N.; McDaniel, D.; Chu, D.T. <i>In vitro</i> and <i>in vivo</i> evaluations of A-80556, a new fluoroquinolone. <i>Antimicrob. Agents Chemother.</i>, <b>1994</b>, 38(5), 1071-8.</p>                                                                                                                                                                                                                                                                                                                                                                                                                                                                                                                                                                                                                                               |
| Amifloxacin     |  <p>6-fluoro-1-(methylamino)-7-(4-methylpiperazin-1-yl)-4-oxo-1,4-dihydroquinoline-3-carboxylic acid</p>                  | <p>Stroshane, R.M.; Silverman, M.H.; Sauer-schell, R.; Brown, R.R.; Boddy, A.W.; Cook, J.A. Preliminary study of the pharmacokinetics of oral amifloxacin in elderly subjects. <i>Antimicrob. Agents Chemother.</i>, <b>1990</b>, 34(5), 751-4.</p> <p>Lode, H. Pharmacokinetics and clinical results of parenterally administered new quinolones in humans. <i>Rev. Infect. Dis.</i>, <b>1989</b>, 11 (S5), S996-1004.</p> <p>Sedlock, D.M.; Dobson, R.A.; Deuel, D.M.; Leshner, G.Y.; Rake, J.B. <i>In vitro</i> and <i>in vivo</i> activities of a new quinolone, WIN 57273, possessing potent activity against gram-positive bacteria. <i>Antimicrob. Agents Chemother.</i>, <b>1990</b>, 34(4), 568-75.</p> <p>Venezia, R.A.; Prymas, L.A.; Shayegani, A.; Yocum, D.M. <i>In vitro</i> activities of amifloxacin and two of its metabolites. <i>Antimicrob. Agents Chemother.</i>, <b>1989</b>, 33(5), 762-6.</p> |
| Balofloxacin    |  <p>1-cyclopropyl-6-fluoro-8-methoxy-7-(3-(methylamino)piperidin-1-yl)-4-oxo-1,4-dihydroquinoline-3-carboxylic acid</p> | <p>Nakashima, M.; Uematsu, T.; Fukuchi, M.; Nakano, M.; Kosuge, K. Clinical phase I study of balofloxacin I. Single oral administration. <i>Jpn. J. Antimicrob. Chemother.</i>, <b>1995</b>, 43(S5), 115-40.</p> <p>Ito, T.; Otsuki, M.; Nishino, T. <i>In vitro</i> antibacterial activity of Q-35, a new fluoroquinolone. <i>Antimicrob. Agents Chemother.</i>, <b>1992</b>, 36(8), 1708-1714.</p>                                                                                                                                                                                                                                                                                                                                                                                                                                                                                                                   |

|               |                                                                                                                                                                                                                                     |                                                                                                                                                                                                                                                                                                                                                                                                                                                                                                                                                                                                                                                                                                                                             |
|---------------|-------------------------------------------------------------------------------------------------------------------------------------------------------------------------------------------------------------------------------------|---------------------------------------------------------------------------------------------------------------------------------------------------------------------------------------------------------------------------------------------------------------------------------------------------------------------------------------------------------------------------------------------------------------------------------------------------------------------------------------------------------------------------------------------------------------------------------------------------------------------------------------------------------------------------------------------------------------------------------------------|
| BAY Y3118     | 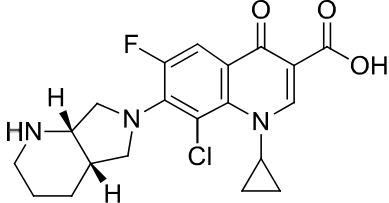 <p>8-chloro-1-cyclopropyl-6-fluoro-7-((4aS,7aS)-hexahydro-1H-pyrrolo[3,4-b]pyridin-6(2H)-yl)-4-oxo-1,4-dihydroquinoline-3-carboxylic acid</p>     | <p>Bongaerts, G.P.A.; Hoogkamp, J.A.A. <i>In vitro</i> activities of BAY Y3118, ciprofloxacin, ofloxacin, and fleroxacin against gram-positive and gram-negative pathogens from respiratory tract and soft tissue infections. <i>Antimicrob. Agents Chemother.</i>, <b>1993</b>, 37(9), 2017-9.</p> <p>Borobio, M.V.; Conejo, M.; Ramirez, E.; Suarez, A.I.; Perea, E.J. Comparative activities of eight quinolones against members of the <i>Bacteroides fragilis</i> group. <i>Antimicrob. Agents Chemother.</i>, <b>1994</b>, 38(6), 1442-5.</p> <p>Wexler, H.M.; Molitoris, E.; Finegold, S.M. <i>In vitro</i> activity of BayY3118 against anaerobic bacteria. <i>Antimicrob. Agents Chemother.</i>, <b>1993</b>, 37(11), 2509-13.</p> |
| Cetefloxacin  |  <p>7-((2S,3R)-3-amino-2-methylazetidin-1-yl)-1-(2,4-difluorophenyl)-6-fluoro-4-oxo-1,4-dihydroquinoline-3-carboxylic acid</p>                    | <p>Borobio, M.V.; Conejo, M.; Ramirez, E.; Suarez, A.I.; Perea, E.J. Comparative activities of eight quinolones against members of the <i>Bacteroides fragilis</i> group. <i>Antimicrob. Agents Chemother.</i>, <b>1994</b>, 38(6), 1442-5.</p> <p>Guinea, J.; Robert, M.; Gargallo-Viola, D.; Xicota, M.A.; Garcia, J.; Tudela, E.; Esteve, M.; Coll, R.; Pares, M.; Roser, R. <i>In vitro</i> and <i>in vivo</i> antibacterial activities of E-4868, a new fluoroquinolone with a 7-azetidin ring substituent. <i>Antimicrob. Agents Chemother.</i>, <b>1993</b>, 37(4), 868-74.</p>                                                                                                                                                      |
| CFC-222       |  <p>7-((1R,6S)-6-amino-1-methyl-3-azabicyclo[3.2.0]heptan-3-yl)-1-cyclopropyl-6-fluoro-4-oxo-1,4-dihydro-1,8-naphthyridine-3-carboxylic acid</p> | <p>Kim, J.H.; Choi, K.H.; Kim, J.W.; Lee, J.H.; Choi, E.C.; Kim, B.K. <i>In-vitro</i> and <i>in-vivo</i> antibacterial activity of CFC-222, a new fluoroquinolone. <i>J. Antimicrob. Chemother.</i>, <b>1998</b>, 41(2), 223-9.</p> <p>Kim, J.H.; Kang, J.A.; Lee, Y.; Lee, K.H.; Lee, J.H.; Choi, E.C.; Kim, B.K. Susceptibility of penicillin-susceptible and -resistant pneumococci to CFC-222, a new fluoroquinolone. <i>J. Antimicrob. Chemother.</i>, <b>1998</b>, 42(4), 527-30.</p>                                                                                                                                                                                                                                                 |
| Ciprofloxacin |  <p>1-cyclopropyl-6-fluoro-4-oxo-7-(piperazin-1-yl)-1,4-dihydroquinoline-3-carboxylic acid</p>                                                   | <p>Meagher, A.K.; Forrest, A.; Dalhoff, A.; Stass, H.; Schentag, J.J. Novel pharmacokinetic-pharmacodynamic model for prediction of outcomes with an extended-release formulation of ciprofloxacin. <i>Antimicrob. Agents Chemother.</i>, <b>2004</b>, 48(6), 2061-8.</p> <p>Wagenlehner, F.M.; Wydra, S.; Onda,</p>                                                                                                                                                                                                                                                                                                                                                                                                                        |

acid

H.; Kinzig-Schippers, M.; Sörgel, F.; Naber, KG. Concentrations in plasma, urinary excretion, and bactericidal activity of linezolid (600 milligrams) versus those of ciprofloxacin (500 milligrams) in healthy volunteers receiving a single oral dose. *Antimicrob. Agents Chemother.*, **2003**, 47(12), 3789-94.

Kamberi, M.; Tsutsumi, K.; Kotegawa, T.; Kawano, K.; Nakamura, K.; Niki, Y.; Nakano, S. Influences of urinary pH on ciprofloxacin pharmacokinetics in humans and antimicrobial activity *in vitro* versus those of sparfloxacin. *Antimicrob. Agents Chemother.*, **1999**, 43(3), 525-9.

Lettieri, J.T.; Rogge, M.C.; Kaiser, L.; Echols, R.M.; Heller, A.H. Pharmacokinetic profiles of ciprofloxacin after single intravenous and oral doses. *Antimicrob Agents Chemother.*, **1992**, 36(5), 993-6.

Barriere, S.L.; Catlin, D.H.; Orlando, P.L.; Noe, A; Frost, R.W. Alteration in the pharmacokinetic disposition of ciprofloxacin by simultaneous administration of azlocillin. *Antimicrob. Agents Chemother.*, **1990**, 34(5), 823-6.

Yuk, J.H.; Nightingale, C.H.; Sweeney, K.R.; Quintiliani, R.; Lettieri, J.T.; Frost, R.W. Relative bioavailability in healthy volunteers of ciprofloxacin administered through a nasogastric tube with and without enteral feeding. *Antimicrob. Agents Chemother.*, **1989**, 33(7), 1118-20.

Dudley, M.N.; Ericson, J.; Zinner, S.H. Effect of dose on serum pharmacokinetics of intravenous ciprofloxacin with identification and characterization of extravascular compartments using noncompartmental and compartmental pharmacokinetic models. *Antimicrob. Agents Chemother.*, **1987**, 31(11), 1782-6.

|  |  |                                                                                                                                                                                                                                                                                                                                                                                                                                                                                                                                                                                                                                                                                                                                                                                                                                                                                                                                                                                                                                                                                                                                                                                                                                                                                                                                                                                                                                                                                                                                                                                                                                                                                                                                                                                                                                                          |
|--|--|----------------------------------------------------------------------------------------------------------------------------------------------------------------------------------------------------------------------------------------------------------------------------------------------------------------------------------------------------------------------------------------------------------------------------------------------------------------------------------------------------------------------------------------------------------------------------------------------------------------------------------------------------------------------------------------------------------------------------------------------------------------------------------------------------------------------------------------------------------------------------------------------------------------------------------------------------------------------------------------------------------------------------------------------------------------------------------------------------------------------------------------------------------------------------------------------------------------------------------------------------------------------------------------------------------------------------------------------------------------------------------------------------------------------------------------------------------------------------------------------------------------------------------------------------------------------------------------------------------------------------------------------------------------------------------------------------------------------------------------------------------------------------------------------------------------------------------------------------------|
|  |  | <p>Plaisance, K.I.; Drusano, G.L.; Forrest, A.; Bustamante, C.I.; Standiford, H.C. Effect of dose size on bioavailability of ciprofloxacin. <i>Antimicrob. Agents Chemother.</i>, <b>1987</b>, 31(6), 956-8.</p> <p>Drusano, G.L.; Standiford, H.C.; Plaisance, K.; Forrest, A.; Leslie, J.; Caldwell, J. Absolute oral bioavailability of ciprofloxacin. <i>Antimicrob. Agents Chemother.</i>, <b>1986</b>, 30(3), 444-6.</p> <p>LeBel, M.; Bergeron, M.G.; Vallée, F.; Fiset, C.; Chassé, G.; Bigonnesse, P.; Rivard, G. Pharmacokinetics and pharmacodynamics of ciprofloxacin in cystic fibrosis patients. <i>Antimicrob. Agents Chemother.</i>, <b>1986</b>, 30(2), 260-6.</p> <p>Lode, H.; Höffken, G.; Boeckk, M.; Deppermann, N.; Borner, K.; Koeppe, P. Quinolone pharmacokinetics and metabolism. <i>J. Antimicrob. Chemother.</i>, <b>1990</b>, 26(SB), 41-9.</p> <p>Cormican, M.G.; Jones, R.N. Antimicrobial activity and spectrum of LB20304, a novel fluoronaphthyridone. <i>Antimicrob. Agents Chemother.</i>, <b>1997</b>, 41(1), 204-11.</p> <p>Tanaka, M.; Yamazaki, E.; Chiba, M.; Yoshihara, K.; Akasaka, T.; Takemura, M.; Sato, K. <i>In vitro</i> antibacterial activities of DQ-113, a potent quinolone, against clinical isolates. <i>Antimicrob. Agents Chemother.</i>, <b>2002</b>, 46(3), 904-8.</p> <p>Brueggemann, A.B.; Kugler, K.C.; Doern, G.V. <i>In vitro</i> activity of BAY 12-8039, a novel 8-methoxyquinolone, compared to activities of six fluoroquinolones against <i>Streptococcus pneumoniae</i>, <i>Haemophilus influenzae</i>, and <i>Moraxella catarrhalis</i>. <i>Antimicrob. Agents Chemother.</i>, <b>1997</b>, 41(7), 1594-7.</p> <p>Montanari, M.P.; Mingoia, M.; Varaldo, P.E. <i>In vitro</i> antibacterial activities of AF 3013, the active metabolite of prulifloxacin, against nosocomial</p> |
|--|--|----------------------------------------------------------------------------------------------------------------------------------------------------------------------------------------------------------------------------------------------------------------------------------------------------------------------------------------------------------------------------------------------------------------------------------------------------------------------------------------------------------------------------------------------------------------------------------------------------------------------------------------------------------------------------------------------------------------------------------------------------------------------------------------------------------------------------------------------------------------------------------------------------------------------------------------------------------------------------------------------------------------------------------------------------------------------------------------------------------------------------------------------------------------------------------------------------------------------------------------------------------------------------------------------------------------------------------------------------------------------------------------------------------------------------------------------------------------------------------------------------------------------------------------------------------------------------------------------------------------------------------------------------------------------------------------------------------------------------------------------------------------------------------------------------------------------------------------------------------|

|  |  |                                                                                                                                                                                                                                                                                                                                                                                                                                                                                                                                                                                                                                                                                                                                                                                                                                                                                                                                                                                                                                                                                                                                                                                                                                                                                                                                                                                                                                                                                                                                                                                                                                                                                                                                                                                                                                                                                             |
|--|--|---------------------------------------------------------------------------------------------------------------------------------------------------------------------------------------------------------------------------------------------------------------------------------------------------------------------------------------------------------------------------------------------------------------------------------------------------------------------------------------------------------------------------------------------------------------------------------------------------------------------------------------------------------------------------------------------------------------------------------------------------------------------------------------------------------------------------------------------------------------------------------------------------------------------------------------------------------------------------------------------------------------------------------------------------------------------------------------------------------------------------------------------------------------------------------------------------------------------------------------------------------------------------------------------------------------------------------------------------------------------------------------------------------------------------------------------------------------------------------------------------------------------------------------------------------------------------------------------------------------------------------------------------------------------------------------------------------------------------------------------------------------------------------------------------------------------------------------------------------------------------------------------|
|  |  | <p>and community Italian isolates. <i>Antimicrob. Agents Chemother.</i>, <b>2001</b>, 45(12), 3616-22.</p> <p>Yun, H.J.; Min, Y.H.; Lim, J.A.; Kang, J.W.; Kim, S.Y.; Kim, M.J.; Jeong, J.H.; Choi, Y.J.; Kwon, H.J.; Jung, Y.H.; Shim, M.J.; Choi, E.C. <i>In vitro</i> and <i>in vivo</i> antibacterial activities of DW286, a new fluoronaphthyridone antibiotic. <i>Antimicrob. Agents Chemother.</i>, <b>2002</b>, 46(9), 3071-4.</p> <p>Hoellman, D.B.; Kelly, L.M.; Jacobs, M.R.; Appelbaum, P.C. Comparative antianaerobic activity of BMS 284756. <i>Antimicrob. Agents Chemother.</i>, <b>2001</b>, 45(2), 589-92.</p> <p>Gargallo-Viola, D.; Ferrer, S.; Tudela, E.; Robert, M.; Coll, R.; Roser, R; Guinea J. Antibacterial activities and pharmacokinetics of E-4767 and E-5065, two new 8-chlorofluoroquinolones with a 7-azetidin ring substituent. <i>Antimicrob. Agents Chemother.</i>, <b>2001</b>, 45(11), 3113-21.</p> <p>Neu, H.C.; Chin, N.X. <i>In vitro</i> activity of the new fluoroquinolone CP-99,219. <i>Antimicrob. Agents Chemother.</i>, <b>1994</b>, 38(11), 2615-22.</p> <p>Neu, H.C.; Fang, W.; Gu, J.W.; Chin, N.X. <i>In vitro</i> activity of OPC-17116. <i>Antimicrob. Agents Chemother.</i>, <b>1992</b>, 36(6), 1310-5.</p> <p>Coll, R.; Gargallo-Viola, D.; Tudela, E.; Xicota, M.A.; Llovera, S.; Guinea, J. Antibacterial activity and pharmacokinetics of four new 7- azetidiny l fluoroquinolones. <i>Antimicrob. Agents Chemother.</i>, <b>1996</b>, 40(1), 274-7.</p> <p>Almer, L.S.; Hoffrage, J.B.; Keller, E.L.; Flamm, R.K.; Shortridge, V.D. <i>In vitro</i> and bactericidal activities of ABT- 492, a novel fluoroquinolone, against Gram-positive and Gram-negative organisms. <i>Antimicrob. Agents Chemother.</i>, <b>2004</b>, 48(7), 2771-7.</p> <p>Nilius, A.M.; Shen, L.L.; Hensey-Rudloff, D.; Almer, L.S.; Beyer, J.M.;</p> |
|--|--|---------------------------------------------------------------------------------------------------------------------------------------------------------------------------------------------------------------------------------------------------------------------------------------------------------------------------------------------------------------------------------------------------------------------------------------------------------------------------------------------------------------------------------------------------------------------------------------------------------------------------------------------------------------------------------------------------------------------------------------------------------------------------------------------------------------------------------------------------------------------------------------------------------------------------------------------------------------------------------------------------------------------------------------------------------------------------------------------------------------------------------------------------------------------------------------------------------------------------------------------------------------------------------------------------------------------------------------------------------------------------------------------------------------------------------------------------------------------------------------------------------------------------------------------------------------------------------------------------------------------------------------------------------------------------------------------------------------------------------------------------------------------------------------------------------------------------------------------------------------------------------------------|

|  |  |                                                                                                                                                                                                                                                                                                                                                                                                                                                                                                                                                                                                                                                                                                                                                                                                                                                                                                                                                                                                                                                                                                                                                                                                                                                                                                                                                                                                                                                                                                                                                                                                                                                                                                                                                                                                                                                                                                                                                            |
|--|--|------------------------------------------------------------------------------------------------------------------------------------------------------------------------------------------------------------------------------------------------------------------------------------------------------------------------------------------------------------------------------------------------------------------------------------------------------------------------------------------------------------------------------------------------------------------------------------------------------------------------------------------------------------------------------------------------------------------------------------------------------------------------------------------------------------------------------------------------------------------------------------------------------------------------------------------------------------------------------------------------------------------------------------------------------------------------------------------------------------------------------------------------------------------------------------------------------------------------------------------------------------------------------------------------------------------------------------------------------------------------------------------------------------------------------------------------------------------------------------------------------------------------------------------------------------------------------------------------------------------------------------------------------------------------------------------------------------------------------------------------------------------------------------------------------------------------------------------------------------------------------------------------------------------------------------------------------------|
|  |  | <p>Balli, D.J.; Cai, Y.; Flamm, R.K. <i>In vitro</i> antibacterial potency and spectrum of ABT-492, a new fluoroquinolone. <i>Antimicrob. Agents Chemother.</i>, <b>2003</b>, 47(10), 3260-9.</p> <p>Yong, D.E.; Cheong, H.J.; Kim, Y.S.; Park, Y.J.; Kim, W.J.; Woo, J.H.; Lee, K.W.; Kang, M.W.; Choo, Y.S. <i>In vitro</i> activity of gemifloxacin against recent clinical isolates of bacteria in Korea. <i>J. Korean Med. Sci.</i>, <b>2002</b>, 17(6), 737-42.</p> <p>Fung-Tomc, J.; Minassian, B.; Kolek, B.; Washo, T.; Huczko, E.; Bonner, D. <i>In vitro</i> antibacterial spectrum of a new broad-spectrum 8-methoxy fluoroquinolone, gatifloxacin. <i>J. Antimicrob. Chemother.</i>, <b>2000</b>, 45(4), 437-46.</p> <p>Schaumann, R.; Ackermann, G.; Pless, B.; Claros, M.C.; Rodloff, A.C. <i>In vitro</i> activities of gatifloxacin, two other quinolones, and five nonquinolone antimicrobials against obligately anaerobic bacteria. <i>Antimicrob. Agents Chemother.</i>, <b>1999</b>, 43(11), 2783-6.</p> <p>Jones, R.N.; Croco, M.A.; Pfaller, M.A.; Beach, M.L.; Kugler, K.C. Antimicrobial activity evaluations of gatifloxacin, a new fluoroquinolone: contemporary pathogen results from a global antimicrobial resistance surveillance program (SENTRY, 1997). <i>Clin. Microbiol. Infect.</i>, <b>1999</b>, 5(9), 540-6.</p> <p>Kim, J.H.; Choi, K.H.; Kim, J.W.; Lee, J.H.; Choi, E.C.; Kim, B.K. <i>In-vitro</i> and <i>in-vivo</i> antibacterial activity of CFC-222, a new fluoroquinolone. <i>J. Antimicrob. Chemother.</i>, <b>1998</b>, 41(2), 223-9.</p> <p>Felmingham, D.; Robbins, M.J.; Ingley, K.; Mathias, I.; Bhogal, H.; Leakey, A.; Ridgway, G.L.; Grüneberg, R.N. <i>In vitro</i> activity of trovafloxacin, a new fluoroquinolone, against recent clinical isolates. <i>J. Antimicrob. Chemother.</i>, <b>1997</b>, 39(SB), 43-9.</p> <p>Cunha, B.A.; Qadri, S.M.; Ueno, Y.; Walters, E.A.; Domenico, P.</p> |
|--|--|------------------------------------------------------------------------------------------------------------------------------------------------------------------------------------------------------------------------------------------------------------------------------------------------------------------------------------------------------------------------------------------------------------------------------------------------------------------------------------------------------------------------------------------------------------------------------------------------------------------------------------------------------------------------------------------------------------------------------------------------------------------------------------------------------------------------------------------------------------------------------------------------------------------------------------------------------------------------------------------------------------------------------------------------------------------------------------------------------------------------------------------------------------------------------------------------------------------------------------------------------------------------------------------------------------------------------------------------------------------------------------------------------------------------------------------------------------------------------------------------------------------------------------------------------------------------------------------------------------------------------------------------------------------------------------------------------------------------------------------------------------------------------------------------------------------------------------------------------------------------------------------------------------------------------------------------------------|

|  |  |                                                                                                                                                                                                                                                                                                                                                                                                                                                                                                                                                                                                                                                                                                                                                                                                                                                                                                                                                                                                                                                                                                                                                                                                                                                                                                                                                                                                                                                                                                                                                                                                                                                                                                                                                                                                                                                                                                                 |
|--|--|-----------------------------------------------------------------------------------------------------------------------------------------------------------------------------------------------------------------------------------------------------------------------------------------------------------------------------------------------------------------------------------------------------------------------------------------------------------------------------------------------------------------------------------------------------------------------------------------------------------------------------------------------------------------------------------------------------------------------------------------------------------------------------------------------------------------------------------------------------------------------------------------------------------------------------------------------------------------------------------------------------------------------------------------------------------------------------------------------------------------------------------------------------------------------------------------------------------------------------------------------------------------------------------------------------------------------------------------------------------------------------------------------------------------------------------------------------------------------------------------------------------------------------------------------------------------------------------------------------------------------------------------------------------------------------------------------------------------------------------------------------------------------------------------------------------------------------------------------------------------------------------------------------------------|
|  |  | <p>Antibacterial activity of trovafloxacin against nosocomial Gram-positive and Gram-negative isolates. <i>J. Antimicrob. Chemother.</i>, <b>1997</b>, 39(SB), 29-34.</p> <p>Endtz, H.P.; Mouton, J.W.; den Hollander, J.G.; van den Braak, N.; Verbrugh, H.A. Comparative <i>in vitro</i> activities of trovafloxacin (CP-99,219) against 445 gram-positive isolates from patients with endocarditis and those with other bloodstream infections. <i>Antimicrob. Agents Chemother.</i>, <b>1997</b>, 41(5), 1146-9.</p> <p>Choi, K.H.; Hong, J.S.; Kim, S.K.; Lee, D.K.; Yoon, S.J.; Choi, E.C. <i>In-vitro</i> and <i>in-vivo</i> activities of DW-116, a new fluoroquinolone. <i>J. Antimicrob. Chemother.</i>, <b>1997</b>, 39(4), 509-14.</p> <p>Clement, J.J.; Tanaka, S.K.; Alder, J.; Vojtko, C.; Beyer, J.; Hensey, D.; Ramer, N.; McDaniel, D.; Chu, D.T. <i>In vitro</i> and <i>in vivo</i> evaluations of A-80556, a new fluoroquinolone. <i>Antimicrob. Agents Chemother.</i>, <b>1994</b>, 38(5), 1071-8.</p> <p>Guinea, J.; Robert, M.; Gargallo-Viola, D.; Xicota, M.A.; Garcia, J.; Tudela, E.; Esteve, M.; Coll, R.; Pares, M.; Roser, R. <i>In vitro</i> and <i>in vivo</i> antibacterial activities of E-4868, a new fluoroquinolone with a 7-azetidin ring substituent. <i>Antimicrob. Agents Chemother.</i>, <b>1993</b>, 37(4), 868-74.</p> <p>Chin, N.X.; Gu, J.W.; Yu, K.W.; Zhang, Y.X.; Neu, H.C. <i>In vitro</i> activity of sparfloxacin. <i>Antimicrob. Agents Chemother.</i>, <b>1991</b>, 35(3), 567-71.</p> <p>Eliopoulos, G.M.; Klimm, K.; Rice, L.B.; Ferraro, M.J.; Moellering, R.C. Jr. Comparative <i>in vitro</i> activity of WIN 57273, a new fluoroquinolone antimicrobial agent. <i>Antimicrob. Agents Chemother.</i>, <b>1990</b>, 34(6), 1154-9.</p> <p>Jones, R.N.; Barry, A.L. <i>In vitro</i> evaluation of WIN 57273, a new broad-spectrum fluoroquinolone.</p> |
|--|--|-----------------------------------------------------------------------------------------------------------------------------------------------------------------------------------------------------------------------------------------------------------------------------------------------------------------------------------------------------------------------------------------------------------------------------------------------------------------------------------------------------------------------------------------------------------------------------------------------------------------------------------------------------------------------------------------------------------------------------------------------------------------------------------------------------------------------------------------------------------------------------------------------------------------------------------------------------------------------------------------------------------------------------------------------------------------------------------------------------------------------------------------------------------------------------------------------------------------------------------------------------------------------------------------------------------------------------------------------------------------------------------------------------------------------------------------------------------------------------------------------------------------------------------------------------------------------------------------------------------------------------------------------------------------------------------------------------------------------------------------------------------------------------------------------------------------------------------------------------------------------------------------------------------------|



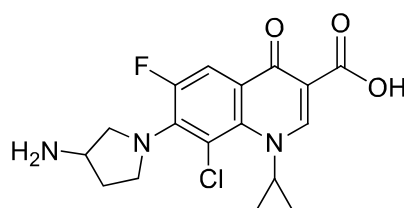

*Antimicrob. Agents Chemother.*, **1990**, 34(2), 306-13.

Barry, A.L.; Fuchs, P.C.; Brown, S.D. *In vitro* activities of three nonfluorinated quinolones against representative bacterial isolates. *Antimicrob. Agents Chemother.*, **2001**, 45(6), 1923-7.

Borobio, M.V.; Conejo, M.; Ramirez, E.; Suarez, A.I.; Perea, E.J. Comparative activities of eight quinolones against members of the *Bacteroides fragilis* group.

*Antimicrob. Agents Chemother.*, **1994**, 38(6), 1442-5.

Bongaerts, G.P.A.; Hoogkamp, J.A.A. *In vitro* activities of BAY Y3118, ciprofloxacin, ofloxacin, and fleroxacin against gram-positive and gram-negative pathogens from respiratory tract and soft tissue infections. *Antimicrob. Agents Chemother.*, **1993**, 37(9), 2017-9.

Goldstein, E.J.; Citron, D.M. Comparative activity of ciprofloxacin, ofloxacin, sparfloxacin, temafloxacin, CI-960, CI-990, and WIN 57273 against anaerobic bacteria. *Antimicrob. Agents Chemother.*, **1992**, 36(5), 1158-62.

Sedlock, D.M.; Dobson, R.A.; Deuel, D.M.; Leshner, G.Y.; Rake, J.B. *In vitro* and *in vivo* activities of a new quinolone, WIN 57273, possessing potent activity against gram-positive bacteria. *Antimicrob. Agents Chemother.*, **1990**, 34(4), 568-75.

Venezia, R.A.; Prymas, L.A.; Shayegani, A.; Yocum, D.M. *In vitro* activities of amifloxacin and two of its metabolites. *Antimicrob. Agents Chemother.*, **1989**, 33(5), 762-6.

Rolston, K.V.; Ho, D.H.; LeBlanc, B.; Bodey, G.P. *In vitro* evaluation of S-25930 and S-25932, two new quinolones, against aerobic gram-negative isolates from cancer patients. *Antimicrob. Agents Chemother.*, **1987**, 31(1), 102-3.

García-Rodríguez, J.A.; García Sánchez, J.E.; Muñoz Bellido, J.L.; Trujillano, I. *In vitro* activities of irloxacin and E-3846, two new quinolones. *Antimicrob. Agents Chemother.*, **1990**, 34(6), 1262-7.

Otani, T.; Tanaka, M.; Ito, E.; Kurosaka, Y.; Murakami, Y.; Onodera,

|               |                                                                                                                |                                                                                                                                                                                                                                                                                                                                                                                                                                                                                                                                                                                                                                                                                                                                                                                                                                                                                                                                                                                                                                                                                                  |
|---------------|----------------------------------------------------------------------------------------------------------------|--------------------------------------------------------------------------------------------------------------------------------------------------------------------------------------------------------------------------------------------------------------------------------------------------------------------------------------------------------------------------------------------------------------------------------------------------------------------------------------------------------------------------------------------------------------------------------------------------------------------------------------------------------------------------------------------------------------------------------------------------------------------------------------------------------------------------------------------------------------------------------------------------------------------------------------------------------------------------------------------------------------------------------------------------------------------------------------------------|
|               |                                                                                                                | <p>K.; Akasaka, T.; Sato, K. <i>In vitro</i> and <i>in vivo</i> antibacterial activities of DK-507k, a novel fluoroquinolone. <i>Antimicrob. Agents Chemother.</i>, <b>2003</b>, 47(12), 3750-9.</p> <p>Roychoudhury, S.; Twinem, T.L.; Makin, K.M.; McIntosh, E.J.; Ledoussal, B.; Catrenich, C.E.</p> <p>Activity of non-fluorinated quinolones (NFQs) against quinolone-resistant <i>Escherichia coli</i> and <i>Streptococcus pneumoniae</i>. <i>J. Antimicrob. Chemother.</i>, <b>2001</b>, 48(1), 29-36.</p> <p>Gooding, B.B.; Jones, R.N. <i>In vitro</i> antimicrobial activity of CP-99,219, a novel azabicyclo-naphthyridone. <i>Antimicrob. Agents Chemother.</i>, <b>1993</b>, 37(2), 349-53.</p>                                                                                                                                                                                                                                                                                                                                                                                    |
| Clinafloxacin | <p>7-(3-aminopyrrolidin-1-yl)-8-chloro-1-cyclopropyl-6-fluoro-4-oxo-1,4-dihydroquinoline-3-carboxylic acid</p> | <p>Wise, R.; Jones, S.; Das, I.; Andrews JM. Pharmacokinetics and inflammatory fluid penetration of clinafloxacin. <i>Antimicrob. Agents Chemother.</i>, <b>1998</b>, 42(2), 428-30.</p> <p>Randinitis, E.J.; Brofuehrer, J.I.; Eiseman, I.; Vassos, A.B. Pharmacokinetics of clinafloxacin after single and multiple doses. <i>Antimicrob. Agents Chemother.</i>, <b>2001</b>, 45(9), 2529-35.</p> <p>Bron, N.J.; Dorr, M.B.; Mant, T.G.; Webb, C.L.; Vassos, A.B. The tolerance and pharmacokinetics of clinafloxacin (CI-960) in healthy subjects. <i>J. Antimicrob. Chemother.</i>, <b>1996</b>, 38(6), 1023-9.</p> <p>Biedenbach, D.J.; Sutton, L.D.; Jones, R.N. Antimicrobial activity of CS-940, a new trifluorinated quinolone. <i>Antimicrob. Agents Chemother.</i>, <b>1995</b>, 39(10), 2325-2330.</p> <p>Snydman, D.R.; Jacobus, N.V.; McDermott, L.A.; Ruthazer, R.; Goldstein, E.; Finegold, S.; Harrell, L.; Hecht, D.W.; Jenkins, S.; Pierson, C.; Venezia, R.; Rihs, J.; Gorbach, S.L. <i>In vitro</i> activities of newer quinolones against bacteroides group organisms.</p> |

|        |                                                                                                                                                                                                                   |                                                                                                                                                                                                                                                                                                                                                                                                                                                                                                                                                                                                                                                                                                                                                                                                                                                                                                                                                                                                                                                                                                                                                                                                                                                                                                                                                                                                                                                                                                                                       |
|--------|-------------------------------------------------------------------------------------------------------------------------------------------------------------------------------------------------------------------|---------------------------------------------------------------------------------------------------------------------------------------------------------------------------------------------------------------------------------------------------------------------------------------------------------------------------------------------------------------------------------------------------------------------------------------------------------------------------------------------------------------------------------------------------------------------------------------------------------------------------------------------------------------------------------------------------------------------------------------------------------------------------------------------------------------------------------------------------------------------------------------------------------------------------------------------------------------------------------------------------------------------------------------------------------------------------------------------------------------------------------------------------------------------------------------------------------------------------------------------------------------------------------------------------------------------------------------------------------------------------------------------------------------------------------------------------------------------------------------------------------------------------------------|
|        | 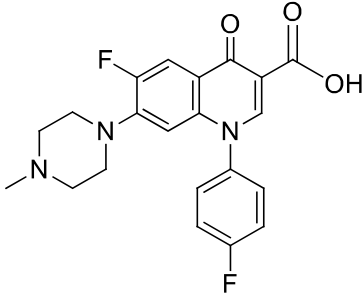                                                                                                                               | <p><i>Antimicrob. Agents Chemother.</i>, <b>2002</b>, 46(10), 3276-9.</p> <p>Milatovic, D.; Schmitz, F.J.; Brisse, S.; Verhoef, J.; Fluit, A.C. <i>In vitro</i> activities of sitafloxacin (DU-6859a) and six other fluoroquinolones against 8,796 clinical bacterial isolates. <i>Antimicrob. Agents Chemother.</i>, <b>2000</b>, 44(4), 1102-7.</p> <p>Roychoudhury, S.; Twinem, T.L.; Makin, K.M.; McIntosh, E.J.; Ledoussal, B.; Catrenich, C.E.</p> <p>Activity of non-fluorinated quinolones (NFQs) against quinolone-resistant <i>Escherichia coli</i> and <i>Streptococcus pneumoniae</i>.</p> <p><i>J. Antimicrob. Chemother.</i>, <b>2001</b>, 48(1), 29-36.</p> <p>Brueggemann, A.B.; Kugler, K.C.; Doern, G.V.</p> <p><i>In vitro</i> activity of BAY 12-8039, a novel 8-methoxyquinolone, compared to activities of six fluoroquinolones against <i>Streptococcus pneumoniae</i>, <i>Haemophilus influenzae</i>, and <i>Moraxella catarrhalis</i>. <i>Antimicrob. Agents Chemother.</i>, <b>1997</b>, 41(7), 1594-7.</p> <p>Borobio, M.V.; Conejo, M.; Ramirez, E.; Suarez, A.I.; Perea, E.J. Comparative activities of eight quinolones against members of the <i>Bacteroides fragilis</i> group. <i>Antimicrob. Agents Chemother.</i>, <b>1994</b>, 38(6), 1442-5.</p> <p>Goldstein, E.J.; Citron, D.M. Comparative activity of ciprofloxacin, ofloxacin, sparfloxacin, temafloxacin, CI-960, CI-990, and WIN 57273 against anaerobic bacteria. <i>Antimicrob. Agents Chemother.</i>, <b>1992</b>, 36(5), 1158-62.</p> |
| CS-940 |  <p>(S)-1-cyclopropyl-8-(difluoromethoxy)-6-fluoro-7-(3-methylpiperazin-1-yl)-4-oxo-1,4-dihydroquinoline-3-carboxylic acid</p> | <p>Biedenbach, D.J.; Sutton, L.D.; Jones, R.N. Antimicrobial activity of CS-940, a new trifluorinated quinolone. <i>Antimicrob. Agents Chemother.</i>, <b>1995</b>, 39(10), 2325-2330.</p>                                                                                                                                                                                                                                                                                                                                                                                                                                                                                                                                                                                                                                                                                                                                                                                                                                                                                                                                                                                                                                                                                                                                                                                                                                                                                                                                            |

|              |                                                                                                                                                                                                                         |                                                                                                                                                                                                                                                                                                                                                                                                                                                                                                                                                                                                                                                                                                                                                                                                                                                                                                                                                                                                                                                          |
|--------------|-------------------------------------------------------------------------------------------------------------------------------------------------------------------------------------------------------------------------|----------------------------------------------------------------------------------------------------------------------------------------------------------------------------------------------------------------------------------------------------------------------------------------------------------------------------------------------------------------------------------------------------------------------------------------------------------------------------------------------------------------------------------------------------------------------------------------------------------------------------------------------------------------------------------------------------------------------------------------------------------------------------------------------------------------------------------------------------------------------------------------------------------------------------------------------------------------------------------------------------------------------------------------------------------|
| Delafloxacin |  <p>1-(6-amino-3,5-difluoropyridin-2-yl)-8-chloro-6-fluoro-7-(3-hydroxyazetidin-1-yl)-4-oxo-1,4-dihydroquinoline-3-carboxylic acid</p> | <p>Almer, L.S.; Hoffrage, J.B.; Keller, E.L.; Flamm, R.K.; Shortridge, V.D. <i>In vitro</i> and bactericidal activities of ABT- 492, a novel fluoroquinolone, against Gram-positive and Gram-negative organisms. <i>Antimicrob. Agents Chemother.</i>, <b>2004</b>, 48(7), 2771-7.</p> <p>Nilius, A.M.; Shen, L.L.; Hensey-Rudloff, D.; Almer, L.S.; Beyer, J.M.; Balli, D.J.; Cai, Y.; Flamm, R.K. <i>In vitro</i> antibacterial potency and spectrum of ABT-492, a new fluoroquinolone. <i>Antimicrob. Agents Chemother.</i>, <b>2003</b>, 47(10), 3260-9.</p> <p>Goldstein, E.J.; Citron, D.M.; Merriam, C.V.; Warren, Y.A.; Tyrrell, K.L.; Fernandez, H.T. <i>In vitro</i> activities of ABT-492, a new fluoroquinolone, against 155 aerobic and 171 anaerobic pathogens isolated from antral sinus puncture specimens from patients with sinusitis. <i>Antimicrob. Agents Chemother.</i>, <b>2003</b>, 47(9), 3008-11.</p>                                                                                                                          |
| Difloxacin   | <p>6-fluoro-1-(4-fluorophenyl)-7-(4-methylpiperazin-1-yl)-4-oxo-1,4-dihydroquinoline-3-carboxylic acid</p>                                                                                                              | <p>McCaffrey, C.; Bertasso, A.; Pace, J.; Georgopapadakou, N.H. Quinolone accumulation in <i>Escherichia coli</i>, <i>Pseudomonas aeruginosa</i>, and <i>Staphylococcus aureus</i>. <i>Antimicrob. Agents Chemother.</i>, 1992, 36(8), 1601-5.</p> <p>Michéa-Hamzehpour, M.; Furet, Y.X.; Pechère, J.C. Role of protein D2 and lipopolysaccharide in diffusion of quinolones through the outer membrane of <i>Pseudomonas aeruginosa</i>. <i>Antimicrob. Agents Chemother.</i>, <b>1991</b>, 35(10), 2091-7.</p> <p>Chapman, J.S.; Georgopapadakou, N.H. Routes of quinolone permeation in <i>Escherichia coli</i>. <i>Antimicrob. Agents Chemother.</i>, <b>1988</b>, 32(4), 438-42.</p> <p>Granneman, G.R.; Snyder, K.M.; Shu, V.S. Difloxacin metabolism and pharmacokinetics in humans after single oral doses. <i>Antimicrob. Agents Chemother.</i>, <b>1986</b>, 30(5), 689-93.</p> <p>Stamm, J.M.; Hanson, C.W.; Chu, D.T.; Bailer, R.; Vojtko, C.; Fernandes, P.B. <i>In vitro</i> evaluation of A-56619 (difloxacin) and A-56620: new aryl-</p> |
|              |                                                                                                                                                                                                                         | <p>fluoroquinolones. <i>Antimicrob. Agents Chemother.</i>, <b>1986</b>, 29(2), 193-200.</p>                                                                                                                                                                                                                                                                                                                                                                                                                                                                                                                                                                                                                                                                                                                                                                                                                                                                                                                                                              |

|          |                                                                                                                                                                                                                                                            |                                                                                                                                                                                                                                                                                                                                                                                                                                                                                                                                                |
|----------|------------------------------------------------------------------------------------------------------------------------------------------------------------------------------------------------------------------------------------------------------------|------------------------------------------------------------------------------------------------------------------------------------------------------------------------------------------------------------------------------------------------------------------------------------------------------------------------------------------------------------------------------------------------------------------------------------------------------------------------------------------------------------------------------------------------|
| DK-507k  | 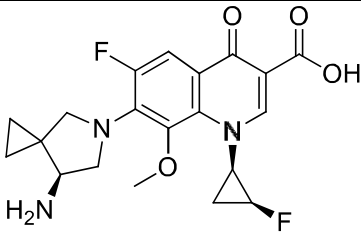 <p>7-((S)-7-amino-5-azaspiro[2.4]heptan-5-yl)-6-fluoro-1-((1R,2S)-2-fluorocyclopropyl)-8-methoxy-4-oxo-1,4-dihydroquinoline-3-carboxylic acid</p>                        | <p>Otani, T.; Tanaka, M.; Ito, E.; Kurosaka, Y.; Murakami, Y.; Onodera, K.; Akasaka, T.; Sato, K. <i>In vitro</i> and <i>in vivo</i> antibacterial activities of DK-507k, a novel fluoroquinolone. <i>Antimicrob. Agents Chemother.</i>, <b>2003</b>, 47(12), 3750-9.</p>                                                                                                                                                                                                                                                                      |
| DQ-113   |  <p>5-amino-7-((3R,4S)-3-(1-aminocyclopropyl)-4-fluoropyrrolidin-1-yl)-6-fluoro-1-((1R,2S)-2-fluorocyclopropyl)-8-methyl-4-oxo-1,4-dihydroquinoline-3-carboxylic acid</p> | <p>Tanaka, M.; Yamazaki, E.; Chiba, M.; Yoshihara, K.; Akasaka, T.; Takemura, M.; Sato, K. <i>In vitro</i> antibacterial activities of DQ-113, a potent quinolone, against clinical isolates. <i>Antimicrob. Agents Chemother.</i>, <b>2002</b>, 46(3), 904-8.</p>                                                                                                                                                                                                                                                                             |
| DV-7751a |  <p>10-(8-amino-6-azaspiro[3.4]octan-6-yl)-9-fluoro-3-methyl-7-oxo-3,7-dihydro-2H-[1,4]oxazino[2,3,4-ij]quinoline-6-carboxylic acid</p>                                 | <p>Tanaka, M.; Tamura, K.; Atarashi, S.; Kubo, Y.; Oliver, S.D.; Bentley, M.; Hakusui, H. Pharmacokinetics and tolerance of a new fluoroquinolone antimicrobial drug after single oral doses in healthy volunteers. <i>Xenobiotica</i>, <b>1995</b>, 25(10), 1119-25.</p> <p>Biedenbach, D.J.; Jones, R.N. <i>In vitro</i> evaluation of DV-7751a, a new fluoroquinolone with an enhanced spectrum of activity against gram-positive aerobic organisms and anaerobes. <i>Antimicrob. Agents Chemother.</i>, <b>1995</b>, 39(7), 1636-1643.</p> |
| DW286    |  <p>(E)-7-(3-(aminomethyl)-4-(methoxyimino)-3-methylpyrrolidin-1-yl)-1-cyclopropyl-6-fluoro-4-oxo-1,4-dihydro-1,8-</p>                                                  | <p>Yun, H.J.; Min, Y.H.; Lim, J.A.; Kang, J.W.; Kim, S.Y.; Kim, M.J.; Jeong, J.H.; Choi, Y.J.; Kwon, H.J.; Jung, Y.H.; Shim, M.J.; Choi, E.C. <i>In vitro</i> and <i>in vivo</i> antibacterial activities of DW286, a new fluoronaphthyridone antibiotic. <i>Antimicrob. Agents Chemother.</i>, <b>2002</b>, 46(9), 3071-4.</p>                                                                                                                                                                                                                |
|          | naphthyridine-3-carboxylic acid                                                                                                                                                                                                                            |                                                                                                                                                                                                                                                                                                                                                                                                                                                                                                                                                |

|          |                                                                                                                                                                                                                 |                                                                                                                                                                                                                                                                                                                                                                                                                                                                                                                                                                                                                                                                                                                                                     |
|----------|-----------------------------------------------------------------------------------------------------------------------------------------------------------------------------------------------------------------|-----------------------------------------------------------------------------------------------------------------------------------------------------------------------------------------------------------------------------------------------------------------------------------------------------------------------------------------------------------------------------------------------------------------------------------------------------------------------------------------------------------------------------------------------------------------------------------------------------------------------------------------------------------------------------------------------------------------------------------------------------|
| E-4767   | 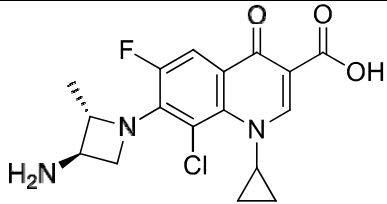 <p>7-((2S,3R)-3-amino-2-methylazetidin-1-yl)-8-chloro-1-cyclopropyl-6-fluoro-4-oxo-1,4-dihydroquinoline-3-carboxylic acid</p> | <p>Gargallo-Viola, D.; Ferrer, S.; Tudela, E.; Robert, M.; Coll, R.; Roser, R.; Guinea, J. Antibacterial activities and pharmacokinetics of E-4767 and E-5065, two new 8-chlorofluoroquinolones with a 7-azetidin ring substituent. <i>Antimicrob. Agents Chemother.</i>, <b>2001</b>, 45(11), 3113-21.</p>                                                                                                                                                                                                                                                                                                                                                                                                                                         |
| E-5065   |  <p>7-(3-aminocyclobutyl)-8-chloro-1-cyclopropyl-6-fluoro-4-oxo-1,4-dihydroquinoline-3-carboxylic acid</p>                     | <p>Gargallo-Viola, D.; Ferrer, S.; Tudela, E.; Robert, M.; Coll, R.; Roser, R.; Guinea, J. Antibacterial activities and pharmacokinetics of E-4767 and E-5065, two new 8-chlorofluoroquinolones with a 7-azetidin ring substituent. <i>Antimicrob. Agents Chemother.</i>, <b>2001</b>, 45(11), 3113-21.</p> <p>Borobio, M.V.; Conejo, M.; Ramirez, E.; Suarez, A.I.; Perea, E.J. Comparative activities of eight quinolones against members of the <i>Bacteroides fragilis</i> group. <i>Antimicrob. Agents Chemother.</i>, <b>1994</b>, 38(6), 1442-5.</p> <p>Wexler, H.M.; Molitoris, E.; Finegold, S.M. <i>In vitro</i> activity of BayY3118 against anaerobic bacteria. <i>Antimicrob. Agents Chemother.</i>, <b>1993</b>, 37(11), 2509-13.</p> |
| Enoxacin |  <p>1-ethyl-6-fluoro-4-oxo-7-(piperazin-1-yl)-1,4-dihydro-1,8-naphthyridine-3-carboxylic acid</p>                            | <p>Wolfson, J.S.; Hooper, D.C. Fluoroquinolone antimicrobial agents. <i>Clin. Microbiol. Rev.</i>, <b>1989</b>, 2(4), 378-424.</p> <p>Lode, H.; Höffken, G.; Boeckk, M.; Deppermann, N.; Borner, K.; Koeppe, P. Quinolone pharmacokinetics and metabolism. <i>J. Antimicrob. Chemother.</i>, <b>1990</b>, 26(SB), 41-9.</p> <p>Wood, M.J. Tissue penetration and clinical efficacy of enoxacin in respiratory tract infections. <i>Clin. Pharmacokinet.</i>, <b>1989</b>, 16(S1), 38-45.</p> <p>Dobbs, B.R.; Gazeley, L.R.; Campbell, A.J.; Edwards, I.R. The effect of age on the pharmacokinetics of enoxacin. <i>Eur. J. Clin. Pharmacol.</i>, <b>1987</b>, 33(1),</p>                                                                           |

|            |                                                                                                                                                                                                   |                                                                                                                                                                                                                                                                                                                                                                                                                                                                                                                                                                                                                                                                                                                                                                                                                                                                                                                                                                                                                                                                |
|------------|---------------------------------------------------------------------------------------------------------------------------------------------------------------------------------------------------|----------------------------------------------------------------------------------------------------------------------------------------------------------------------------------------------------------------------------------------------------------------------------------------------------------------------------------------------------------------------------------------------------------------------------------------------------------------------------------------------------------------------------------------------------------------------------------------------------------------------------------------------------------------------------------------------------------------------------------------------------------------------------------------------------------------------------------------------------------------------------------------------------------------------------------------------------------------------------------------------------------------------------------------------------------------|
|            |                                                                                                                                                                                                   | <p>101-4.</p> <p>Somogyi, A.A.; Bochner, F.; Misiak, P.M.; Eldon, M.A.; Toothaker, R.D.; Sedman, A.J. Effects of oral cimetidine or ranitidine on the pharmacokinetics of intravenous enoxacin. <i>J. Clin. Pharmacol.</i>, <b>1993</b>, 33(1), 53-6.</p> <p>Somogyi, A.A.; Bochner, F. The absorption and disposition of enoxacin in healthy subjects. <i>J. Clin. Pharmacol.</i>, <b>1988</b>, 28(8), 707-13.</p> <p>Jones, R.N.; Barry, A.L. <i>In vitro</i> evaluation of WIN 57273, a new broad-spectrum fluoroquinolone. <i>Antimicrob. Agents Chemother.</i>, <b>1990</b>, 34(2), 306-13.</p> <p>Rolston, K.V.; Ho, D.H.; LeBlanc, B.; Bodey, G.P. <i>In vitro</i> evaluation of S-25930 and S-25932, two new quinolones, against aerobic gram-negative isolates from cancer patients. <i>Antimicrob. Agents Chemother.</i>, <b>1987</b>, 31(1), 102-3.</p> <p>Gooding, B.B.; Jones, R.N. <i>In vitro</i> antimicrobial activity of CP-99,219, a novel azabicyclo-naphthyridone. <i>Antimicrob. Agents Chemother.</i>, <b>1993</b>, 37(2), 349-353.</p> |
| Fleroxacin | 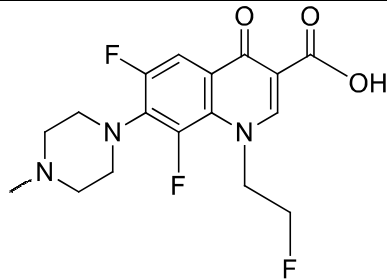 <p>6,8-difluoro-1-(2-fluoroethyl)-7-(4-methylpiperazin-1-yl)-4-oxo-1,4-dihydroquinoline-3-carboxylic acid</p> | <p>Nightingale, C.H. Overview of the pharmacokinetics of fleroxacin. <i>Am. J. Med.</i>, <b>1993</b>, 94(3A), 38S-43S.</p> <p>Weidekamm, E. Pharmacokinetics of fleroxacin in renal impairment. <i>Am. J. Med.</i>, <b>1993</b>, 94(3A), 70S-74S.</p> <p>Sorgel, F.; Metz, R.; Naber, K.; Seelmann, R.; Muth, P. Pharmacokinetics and body fluid penetration of fleroxacin in healthy volunteers. <i>J. Antimicrob. Chemother.</i>, <b>1988</b>, 22(SD), 155-67.</p> <p>Reigner, B.G.; Welker, H.A. Factors influencing elimination and distribution of fleroxacin: metaanalysis of individual data from 10 pharmacokinetic studies. <i>Antimicrob. Agents Chemother.</i>, <b>1996</b>, 40(3), 575-80.</p> <p>Blouin, R.A.; Hamelin, B.A.; Smith, D.A.; Foster, T.S.; John, W.J.; Welker,</p>                                                                                                                                                                                                                                                                  |
|            |                                                                                                                                                                                                   | <p>H.A. Fleroxacin pharmacokinetics in patients with liver cirrhosis. <i>Antimicrob.</i></p>                                                                                                                                                                                                                                                                                                                                                                                                                                                                                                                                                                                                                                                                                                                                                                                                                                                                                                                                                                   |

|             |                                                                                                               |                                                                                                                                                                                                                                                                                                                                                                                                                                                                                                                                                                                                                                                                                                                                                                                                                                                                                                                                                                                                                                                                                                                                                                                                                                                                                                                                                                                                                                                                                                                                                                                                                     |
|-------------|---------------------------------------------------------------------------------------------------------------|---------------------------------------------------------------------------------------------------------------------------------------------------------------------------------------------------------------------------------------------------------------------------------------------------------------------------------------------------------------------------------------------------------------------------------------------------------------------------------------------------------------------------------------------------------------------------------------------------------------------------------------------------------------------------------------------------------------------------------------------------------------------------------------------------------------------------------------------------------------------------------------------------------------------------------------------------------------------------------------------------------------------------------------------------------------------------------------------------------------------------------------------------------------------------------------------------------------------------------------------------------------------------------------------------------------------------------------------------------------------------------------------------------------------------------------------------------------------------------------------------------------------------------------------------------------------------------------------------------------------|
|             |                                                                                                               | <p><i>Agents Chemother.</i>, <b>1992</b>, 36(3), 632-8.</p> <p>Weidekamm, E.; Portmann, R.; Suter, K.; Partos, C.; Dell, D.; Lücker, P.W. Single- and multiple-dose pharmacokinetics of fleroxacin, a trifluorinated quinolone, in humans. <i>Antimicrob. Agents Chemother.</i>, <b>1987</b>, 31(12), 1909-14.</p> <p>Gargallo-Viola, D.; Ferrer, S.; Tudela, E.; Robert, M.; Coll, R.; Roser, R., Guinea J. Antibacterial activities and pharmacokinetics of E-4767 and E-5065, two new 8-chlorofluoroquinolones with a 7-azetidin ring substituent. <i>Antimicrob. Agents Chemother.</i>, <b>2001</b>, 45(11), 3113-21.</p> <p>Neu, H.C.; Fang, W.; Gu, J.W.; Chin, N.X. <i>In vitro</i> activity of OPC-17116. <i>Antimicrob. Agents Chemother.</i>, <b>1992</b>, 36(6), 1310-5.</p> <p>Guinea, J.; Robert, M.; Gargallo-Viola, D.; Xicota, M.A.; Garcia, J.; Tudela, E.; Esteve, M.; Coll, R.; Pares, M.; Roser, R. <i>In vitro</i> and <i>in vivo</i> antibacterial activities of E-4868, a new fluoroquinolone with a 7-azetidin ring substituent. <i>Antimicrob. Agents Chemother.</i>, <b>1993</b>, 37(4), 868-74.</p> <p>Jones, R.N.; Barry, A.L. <i>In vitro</i> evaluation of WIN 57273, a new broad-spectrum fluoroquinolone. <i>Antimicrob. Agents Chemother.</i>, <b>1990</b>, 34(2), 306-13.</p> <p>Bongaerts, G.P.A.; Hoogkamp, J.A.A. <i>In vitro</i> activities of BAY Y3118, ciprofloxacin, ofloxacin, and fleroxacin against gram-positive and gram-negative pathogens from respiratory tract and soft tissue infections. <i>Antimicrob. Agents Chemother.</i>, <b>1993</b>, 37(9), 2017-9.</p> |
| Garenoxacin | 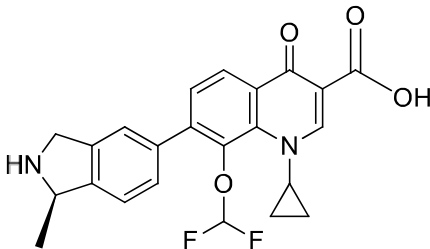                           | <p>Hayakawa, H.; Fukushima, Y.; Kato, H.; Fukumoto, H.; Kadota, T.; Yamamoto, H.; Kuroiwa,</p>                                                                                                                                                                                                                                                                                                                                                                                                                                                                                                                                                                                                                                                                                                                                                                                                                                                                                                                                                                                                                                                                                                                                                                                                                                                                                                                                                                                                                                                                                                                      |
|             | (R)-1-cyclopropyl-8-(difluoromethoxy)-7-(1-methylisindolin-5-yl)-4-oxo-1,4-dihydroquinoline-3-carboxylic acid | <p>H.; Nishigaki, J.; Tsuji, A. Metabolism and disposition of novel des-fluoro</p>                                                                                                                                                                                                                                                                                                                                                                                                                                                                                                                                                                                                                                                                                                                                                                                                                                                                                                                                                                                                                                                                                                                                                                                                                                                                                                                                                                                                                                                                                                                                  |



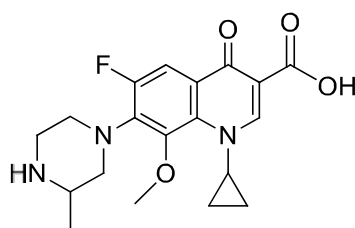

quinolone garenoxacin in experimental animals and interspecies scaling of pharmacokinetic parameters. *Drug Metab. Dispos.*, 2003, 31(11), 1409-18.

Gajjar, D.A.; Bello, A.; Ge, Z.; Christopher, L.; Grasela, D.M. Multiple-dose safety and pharmacokinetics of oral garenoxacin in healthy subjects. *Antimicrob. Agents Chemother.*, **2003**, 47(7), 2256-63.

Tanaka, M.; Yamazaki, E.; Chiba, M.; Yoshihara, K.; Akasaka, T.; Takemura, M.; Sato, K. *In vitro* antibacterial activities of DQ-113, a potent quinolone, against clinical isolates. *Antimicrob. Agents Chemother.*, **2002**, 46(3), 904-8.

Cormican, M.G.; Jones, R.N. Antimicrobial activity and spectrum of LB20304, a novel fluoronaphthyridone. *Antimicrob. Agents Chemother.*, **1997**, 41(1), 204-11.

Hoellman, D.B.; Kelly, L.M.; Jacobs, M.R.; Appelbaum, P.C. Comparative antianaerobic activity of BMS 284756. *Antimicrob. Agents Chemother.*, **2001**, 45(2), 589-92.

Snydman, D.R.; Jacobus, N.V.; McDermott, L.A.; Ruthazer, R.; Goldstein, E.; Finegold, S.; Harrell, L.; Hecht, D.W.; Jenkins, S.; Pierson, C.; Venezia, R.; Rihs, J.; Gorbach, S.L. *In vitro* activities of newer quinolones against bacteroides group organisms. *Antimicrob. Agents Chemother.*, **2002**, 46(10), 3276-9.

Otani, T.; Tanaka, M.; Ito, E.; Kurosaka, Y.; Murakami, Y.; Onodera, K.; Akasaka, T.; Sato, K. *In vitro* and *in vivo* antibacterial activities of DK-507k, a

novel fluoroquinolone. *Antimicrob. Agents Chemother.*, **2003**, 47(12), 3750-9.

Gatifloxacin

Lober, S.; Ziege, S.; Rau, M.; Schreiber, G.; Mignot, A.; Koeppe, P.; Lode, H.

1-cyclopropyl-6-fluoro-8-methoxy-7-(3-methylpiperazin-1-yl)-4-oxo-1,4-dihydroquinoline-3-carboxylic acid

Pharmacokinetics of gatifloxacin and interaction with an antacid containing aluminum and magnesium. *Antimicrob. Agents Chemother.*, **1999**, 43(5), 1067-71.

Lubasch, A.; Keller, I.; Borner, K.; Koeppe, P.; Lode, H. Comparative pharmacokinetics of ciprofloxacin, gatifloxacin, grepafloxacin, levofloxacin, trovafloxacin, and moxifloxacin after single oral administration in healthy volunteers. *Antimicrob. Agents Chemother.*, **2000**, 44(10), 2600-3.

Boy, D.; Well, M.; Kinzig-Schippers, M.; Sörgel, F.; Ankel-Fuchs, D.; Naber, K.G. Urinary bactericidal activity, urinary excretion and plasma concentrations of gatifloxacin (400 mg) versus ciprofloxacin (500 mg) in healthy volunteers after a single oral dose. *Int. J. Antimicrob. Agents*, **2004**, 23(S1), S6-16.

Tanaka, M.; Yamazaki, E.; Chiba, M.; Yoshihara, K.; Akasaka, T.; Takemura, M.; Sato, K. *In vitro* antibacterial activities of DQ-113, a potent quinolone, against clinical isolates. *Antimicrob. Agents Chemother.*, **2002**, 46(3), 904-8.

Milatovic, D.; Schmitz, F.J.; Brisse, S.; Verhoef, J.; Fluit, A.C. *In vitro* activities of sitafloxacin (DU-6859a) and six other fluoroquinolones against 8,796 clinical bacterial isolates. *Antimicrob. Agents Chemother.*, **2000**, 44(4), 1102-7.

Almer, L.S.; Hoffrage, J.B.; Keller, E.L.; Flamm, R.K.; Shortridge, V.D. *In vitro* and bactericidal activities of ABT-492, a novel fluoroquinolone, against Gram-positive and Gram-negative organisms. *Antimicrob. Agents Chemother.*, **2004**, 48(7), 2771-7.

Yong, D.E.; Cheong, H.J.; Kim, Y.S.; Park, Y.J.; Kim, W.J.; Woo, J.H.; Lee, K.W.; Kang, M.W.; Choo,

Y.S. *In vitro* activity of gemifloxacin against recent clinical isolates of bacteria in Korea. *J. Korean Med. Sci.*, **2002**, 17(6), 737-42.

Fung-Tomc, J.; Minassian, B.; Kolek, B.; Washo, T.; Huczko, E.; Bonner, D. *In vitro* antibacterial spectrum of a new

|  |                                                                                                                                                                                                                                                                                                                                                                                                                                                                                                                                                                                                                                                                                                                                                                                                                                                                                                                                                                                                                                                                                                                                                                                                                                                                                                                                                                                                                                                                                                  |
|--|--------------------------------------------------------------------------------------------------------------------------------------------------------------------------------------------------------------------------------------------------------------------------------------------------------------------------------------------------------------------------------------------------------------------------------------------------------------------------------------------------------------------------------------------------------------------------------------------------------------------------------------------------------------------------------------------------------------------------------------------------------------------------------------------------------------------------------------------------------------------------------------------------------------------------------------------------------------------------------------------------------------------------------------------------------------------------------------------------------------------------------------------------------------------------------------------------------------------------------------------------------------------------------------------------------------------------------------------------------------------------------------------------------------------------------------------------------------------------------------------------|
|  | <p>broad-spectrum 8-methoxy fluoroquinolone, gatifloxacin. <i>J. Antimicrob. Chemother.</i>, <b>2000</b>, 45(4), 437-46.</p> <p>Jones, R.N.; Croco, M.A.; Pfaller, M.A.; Beach, M.L.; Kugler, K.C. Antimicrobial activity evaluations of gatifloxacin, a new fluoroquinolone: contemporary pathogen results from a global antimicrobial resistance surveillance program (SENTRY, 1997). <i>Clin. Microbiol. Infect.</i>, <b>1999</b>, 5(9), 540-6.</p> <p>Otani, T.; Tanaka, M.; Ito, E.; Kurosaka, Y.; Murakami, Y.; Onodera, K.; Akasaka, T.; Sato, K. <i>In vitro</i> and <i>in vivo</i> antibacterial activities of DK-507k, a novel fluoroquinolone. <i>Antimicrob. Agents Chemother.</i>, <b>2003</b>, 47(12), 3750-9.</p> <p>Roychoudhury, S.; Twinem, T.L.; Makin, K.M.; McIntosh, E.J.; Ledoussal, B.; Catrenich, C.E. Activity of non-fluorinated quinolones (NFQs) against quinolone-resistant <i>Escherichia coli</i> and <i>Streptococcus pneumoniae</i>. <i>J. Antimicrob. Chemother.</i>, <b>2001</b>, 48(1), 29-36.</p> <p>Fukuda, H.; Hori, S.; Hiramatsu, K. Antibacterial activity of gatifloxacin (AM-1155, CG5501, BMS-206584), a newly developed fluoroquinolone, against sequentially acquired quinolone-resistant mutants and the norA transformant of <i>Staphylococcus aureus</i>. <i>Antimicrob. Agents Chemother.</i>, <b>1998</b>, 42(8), 1917-22.</p> <p>Perry, C.M.; Barman Balfour, J.A.; Lamb, H.M. Gatifloxacin. <i>Drugs</i>, <b>1999</b>, 58(4), 683-96.</p> |
|--|--------------------------------------------------------------------------------------------------------------------------------------------------------------------------------------------------------------------------------------------------------------------------------------------------------------------------------------------------------------------------------------------------------------------------------------------------------------------------------------------------------------------------------------------------------------------------------------------------------------------------------------------------------------------------------------------------------------------------------------------------------------------------------------------------------------------------------------------------------------------------------------------------------------------------------------------------------------------------------------------------------------------------------------------------------------------------------------------------------------------------------------------------------------------------------------------------------------------------------------------------------------------------------------------------------------------------------------------------------------------------------------------------------------------------------------------------------------------------------------------------|

|               |                                                                                                                                                                                                                               |                                                                                                                                                                                                                                                                                                                                                                                                                                                                                                                                                                                                                                                                                                                                                                                                                                                                                                                                                                                                                                                                                                                                                                     |
|---------------|-------------------------------------------------------------------------------------------------------------------------------------------------------------------------------------------------------------------------------|---------------------------------------------------------------------------------------------------------------------------------------------------------------------------------------------------------------------------------------------------------------------------------------------------------------------------------------------------------------------------------------------------------------------------------------------------------------------------------------------------------------------------------------------------------------------------------------------------------------------------------------------------------------------------------------------------------------------------------------------------------------------------------------------------------------------------------------------------------------------------------------------------------------------------------------------------------------------------------------------------------------------------------------------------------------------------------------------------------------------------------------------------------------------|
| Gemifloxacin  | 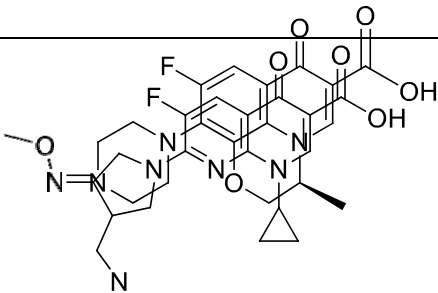 <p>(Z)-7-(3-(aminomethyl)-4-(methoxyimino)pyrrolidin-1-yl)-1-cyclopropyl-6-fluoro-4-oxo-1,4-dihydro-1,8-naphthyridine-3-carboxylic acid</p> | <p>Allen, A.; Bygate, E.; Vousden, M.; Oliver, S.; Johnson, M.; Ward, C.; Cheon, A.; Choo, Y.S.; Kim, I. Multiple-dose pharmacokinetics and tolerability of gemifloxacin administered orally to healthy volunteers. <i>Antimicrob. Agents Chemother.</i>, <b>2001</b>, 45(2), 540-5.</p> <p>Tanaka, M.; Yamazaki, E.; Chiba, M.; Yoshihara, K.; Akasaka, T.; Takemura, M.; Sato, K. <i>In vitro</i> antibacterial activities of DQ-113, a potent quinolone, against clinical isolates. <i>Antimicrob. Agents Chemother.</i>, <b>2002</b>, 46(3), 904-8.</p> <p>Yun, H.J.; Min, Y.H.; Lim, J.A.; Kang, J.W.; Kim, S.Y.; Kim, M.J.; Jeong, J.H.; Choi, Y.J.; Kwon, H.J.; Jung, Y.H.; Shim, M.J.; Choi, E.C. <i>In vitro</i> and <i>in vivo</i> antibacterial activities of DW286, a new fluoronaphthyridone antibiotic. <i>Antimicrob. Agents Chemother.</i>, <b>2002</b>, 46(9), 3071-4.</p> <p>Yong, D.E.; Cheong, H.J.; Kim, Y.S.; Park, Y.J.; Kim, W.J.; Woo, J.H.; Lee, K.W.; Kang, M.W.; Choo, Y.S. <i>In vitro</i> activity of gemifloxacin against recent clinical isolates of bacteria in Korea. <i>J. Korean Med. Sci.</i>, <b>2002</b>, 17(6), 737-42.</p> |
| Grepafloxacin |  <p>1-cyclopropyl-6-fluoro-5-methyl-7-(3-methylpiperazin-1-yl)-4-oxo-1,4-dihydroquinoline-3-carboxylic acid</p>                            | <p>Efthymiopoulos, C.; Bramer, S.L.; Maroli, A. Pharmacokinetics of grepafloxacin after oral administration of single and repeat doses in healthy young males. <i>Clin. Pharmacokinet.</i>, <b>1997</b>, 33(S1), 1-8.</p> <p>Pea, F.; Pavan, F.; Lugatti, E.; Dolcet, F.; Talmassons, G.; Screm, M.C.; Furlanut, M. Pharmacokinetic and pharmacodynamic aspects of oral moxifloxacin 400 mg/day in elderly patients with acute exacerbation of chronic bronchitis. <i>Clin. Pharmacokinet.</i>, <b>2006</b>, 45(3), 287-95.</p> <p>Neu, H.C.; Fang, W.; Gu, J.W.; Chin, N.X. <i>In vitro</i> activity of OPC-17116. <i>Antimicrob. Agents Chemother.</i>, <b>1992</b>, 36(6), 1310-5.</p>                                                                                                                                                                                                                                                                                                                                                                                                                                                                           |
| Levofloxacin  |                                                                                                                                                                                                                               | <p>Chien, S.C.; Wong, F.A.; Fowler, C.L.; Callery-D'Amico, S.V.; Williams, R.R.; Nayak, R.; Chow, A.T.</p>                                                                                                                                                                                                                                                                                                                                                                                                                                                                                                                                                                                                                                                                                                                                                                                                                                                                                                                                                                                                                                                          |

(S)-9-fluoro-3-methyl-10-(4-methylpiperazin-1-yl)-7-oxo-3,7-dihydro-2H-[1,4]oxazino[2,3,4-ij]quinoline-6-carboxylic acid

Double-blind evaluation of the safety and pharmacokinetics of multiple oral once-daily 750-milligram and 1-gram doses of levofloxacin in healthy volunteers.

*Antimicrob. Agents Chemother.*, **1998**, 42(4), 885-8.

Chien, S.C.; Rogge, M.C.; Gisclon, L.G.; Curtin, C.; Wong, F.; Natarajan, J.; Williams, R.R.; Fowler, C.L.; Cheung, W.K.; Chow, A.T. Pharmacokinetic profile of levofloxacin following once-daily 500-milligram oral or intravenous doses. *Antimicrob. Agents Chemother.*, **1997**, 41(10), 2256-60.

Okazaki, O.; Kojima, C.; Hakusui, H.; Nakashima, M. Enantioselective disposition of ofloxacin in humans. *Antimicrob. Agents Chemother.*, **1991**, 35(10), 2106-9.

Lubasch, A.; Keller, I.; Borner, K.; Koeppe, P.; Lode, H. Comparative pharmacokinetics of ciprofloxacin, gatifloxacin, grepafloxacin, levofloxacin, trovafloxacin, and moxifloxacin after single oral administration in healthy volunteers. *Antimicrob. Agents Chemother.*, **2000**, 44(10), 2600-3.

Geerdes-Fenge, H.F.; Wiedersich, A.; Wagner, S.; Lehr, K.H.; Koeppe, P.; Lode, H. Levofloxacin pharmacokinetics and serum bactericidal activities against five enterobacterial species. *Antimicrob. Agents Chemother.*, **2000**, 44(12), 3478-80.

Tanigawara, Y.; Nomura, H.; Kagimoto, N.; Okumura, K.; Hori, R. Premarketing population pharmacokinetic study of levofloxacin in normal subjects and patients with infectious diseases. *Biol. Pharm. Bull.*, **1995**, 18(2), 315-20.

Fish, D.N.; Chow, A.T. The clinical pharmacokinetics of levofloxacin. *Clin. Pharmacokinet.*, **1997**, 32(2), 101-19.

Azanza, J.R.; Sádaba, B.; Quetglas,

E.G.; Escolar, M. Levofloxacin.

*Rev. Med. Univ. Navarra*, **1998**, 42(4), 220-5.

Davis, R.; Bryson, H.M. Levofloxacin. A review of its antibacterial activity,

|  |  |                                                                                                                                                                                                                                                                                                                                                                                                                                                                                                                                                                                                                                                                                                                                                                                                                                                                                                                                                                                                                                                                                                                                                                                                                                                                                                                                                                                                                                                                                                                                                                                              |
|--|--|----------------------------------------------------------------------------------------------------------------------------------------------------------------------------------------------------------------------------------------------------------------------------------------------------------------------------------------------------------------------------------------------------------------------------------------------------------------------------------------------------------------------------------------------------------------------------------------------------------------------------------------------------------------------------------------------------------------------------------------------------------------------------------------------------------------------------------------------------------------------------------------------------------------------------------------------------------------------------------------------------------------------------------------------------------------------------------------------------------------------------------------------------------------------------------------------------------------------------------------------------------------------------------------------------------------------------------------------------------------------------------------------------------------------------------------------------------------------------------------------------------------------------------------------------------------------------------------------|
|  |  | <p>pharmacokinetics and therapeutic efficacy. <i>Drugs</i>, <b>1994</b>, 47(4), 677-700.</p> <p>Cormican, M.G.; Jones, R.N. Antimicrobial activity and spectrum of LB20304, a novel fluoronaphthyridone. <i>Antimicrob. Agents Chemother.</i>, <b>1997</b>, 41(1), 204-11.</p> <p>Goldstein, E.J.; Citron, D.M.; Hudspeth, M.; Hunt Gerardo, S.; Merriam, C.V. Trovafloxacin compared with levofloxacin, ofloxacin, ciprofloxacin, azithromycin and clarithromycin against unusual aerobic and anaerobic human and animal bite-wound pathogens. <i>J. Antimicrob. Chemother.</i>, <b>1998</b>, 41(3), 391-6.</p> <p>Tanaka, M.; Yamazaki, E.; Chiba, M.; Yoshihara, K.; Akasaka, T.; Takemura, M.; Sato, K. <i>In vitro</i> antibacterial activities of DQ-113, a potent quinolone, against clinical isolates. <i>Antimicrob. Agents Chemother.</i>, <b>2002</b>, 46(3), 904-8.</p> <p>Brueggemann, A.B.; Kugler, K.C.; Doern, G.V. <i>In vitro</i> activity of BAY 12-8039, a novel 8-methoxyquinolone, compared to activities of six fluoroquinolones against <i>Streptococcus pneumoniae</i>, <i>Haemophilus influenzae</i>, and <i>Moraxella catarrhalis</i>. <i>Antimicrob. Agents Chemother.</i>, <b>1997</b>, 41(7), 1594-7.</p> <p>Montanari, M.P.; Mingoia, M.; Varaldo, P.E. <i>In vitro</i> antibacterial activities of AF 3013, the active metabolite of prulifloxacin, against nosocomial and community Italian isolates. <i>Antimicrob. Agents Chemother.</i>, <b>2001</b>, 45(12), 3616-22.</p> <p>Hoellman, D.B.; Kelly, L.M.; Jacobs, M.R.; Appelbaum, P.C. Comparative</p> |
|  |  | <p>antianaerobic activity of BMS 284756. <i>Antimicrob. Agents Chemother.</i>, <b>2001</b>, 45(2), 589-92.</p> <p>Milatovic, D.; Schmitz, F.J.; Brisse, S.; Verhoef, J.; Fluit, A.C. <i>In vitro</i> activities of sitafloxacin (DU-6859a) and six other fluoroquinolones against 8,796 clinical</p>                                                                                                                                                                                                                                                                                                                                                                                                                                                                                                                                                                                                                                                                                                                                                                                                                                                                                                                                                                                                                                                                                                                                                                                                                                                                                         |

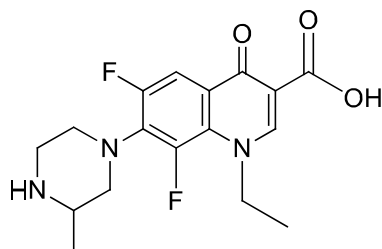

|              |  |                                                                                                                                                                                                                                                                                                                                                                                                                                                                                                                                                                                                                                                                                                                                                                                                                                                                                                                                                                                                                                                                                                                                                                                                                                                                                                                                                                                                                                                                                                                                                                                                                                                                                                                           |
|--------------|--|---------------------------------------------------------------------------------------------------------------------------------------------------------------------------------------------------------------------------------------------------------------------------------------------------------------------------------------------------------------------------------------------------------------------------------------------------------------------------------------------------------------------------------------------------------------------------------------------------------------------------------------------------------------------------------------------------------------------------------------------------------------------------------------------------------------------------------------------------------------------------------------------------------------------------------------------------------------------------------------------------------------------------------------------------------------------------------------------------------------------------------------------------------------------------------------------------------------------------------------------------------------------------------------------------------------------------------------------------------------------------------------------------------------------------------------------------------------------------------------------------------------------------------------------------------------------------------------------------------------------------------------------------------------------------------------------------------------------------|
|              |  | <p>bacterial isolates. <i>Antimicrob. Agents Chemother.</i>, <b>2000</b>, 44(4), 1102-7.</p> <p>Coll, R.; Gargallo-Viola, D.; Tudela, E.; Xicota, M.A.; Llovera, S.; Guinea, J. Antibacterial activity and pharmacokinetics of four new 7-azetidiny fluoroquinolones. <i>Antimicrob. Agents Chemother.</i>, <b>1996</b>, 40(1), 274-7.</p> <p>Almer, L.S.; Hoffrage, J.B.; Keller, E.L.; Flamm, R.K.; Shortridge, V.D. <i>In vitro</i> and bactericidal activities of ABT-492, a novel fluoroquinolone, against Gram-positive and Gram-negative organisms. <i>Antimicrob. Agents Chemother.</i>, <b>2004</b>, 48(7), 2771-7.</p> <p>Nilius, A.M.; Shen, L.L.; Hensey-Rudloff, D.; Almer, L.S.; Beyer, J.M.; Balli, D.J.; Cai, Y.; Flamm, R.K. <i>In vitro</i> antibacterial potency and spectrum of ABT-492, a new fluoroquinolone. <i>Antimicrob. Agents Chemother.</i>, <b>2003</b>, 47(10), 3260-9.</p> <p>Yong, D.E.; Cheong, H.J.; Kim, Y.S.; Park, Y.J.; Kim, W.J.; Woo, J.H.; Lee, K.W.; Kang, M.W.; Choo, Y.S. <i>In vitro</i> activity of gemifloxacin against recent clinical isolates of bacteria in Korea. <i>J. Korean Med. Sci.</i>, <b>2002</b>, 17(6), 737-42.</p> <p>Barry, A.L.; Fuchs, P.C.; Brown, S.D. <i>In vitro</i> activities of three nonfluorinated quinolones against representative bacterial isolates. <i>Antimicrob. Agents Chemother.</i>, <b>2001</b>, 45(6), 1923-7.</p> <p>Rolston, K.V.; Ho, D.H.; LeBlanc, B.; Bodey, G.P. <i>In vitro</i> evaluation of S-25930 and S-25932, two new quinolones, against aerobic gram-negative isolates from cancer patients. <i>Antimicrob. Agents Chemother.</i>, <b>1987</b>, 31(1), 102-3.</p> <p>Otani, T.; Tanaka, M.; Ito, E.; Kurosaka,</p> |
|              |  | <p>Y.; Murakami, Y.; Onodera, K.; Akasaka, T.; Sato, K. <i>In vitro</i> and <i>in vivo</i> antibacterial activities of DK-507k, a novel fluoroquinolone. <i>Antimicrob. Agents Chemother.</i>, <b>2003</b>, 47(12), 3750-9.</p>                                                                                                                                                                                                                                                                                                                                                                                                                                                                                                                                                                                                                                                                                                                                                                                                                                                                                                                                                                                                                                                                                                                                                                                                                                                                                                                                                                                                                                                                                           |
| Lomefloxacin |  | <p>Freeman, C.D.; Nicolau, D.P.; Belliveau, P.P.; Nightingale, C.H. Lomefloxacin clinical pharmacokinetics. <i>Clin.</i></p>                                                                                                                                                                                                                                                                                                                                                                                                                                                                                                                                                                                                                                                                                                                                                                                                                                                                                                                                                                                                                                                                                                                                                                                                                                                                                                                                                                                                                                                                                                                                                                                              |

1-ethyl-6,8-difluoro-7-(3-methylpiperazin-1-yl)-4-oxo-1,4-dihydroquinoline-3-carboxylic acid

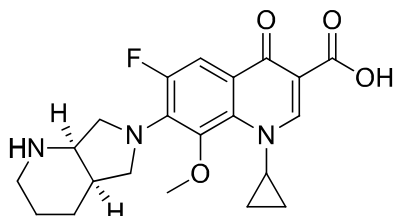

*Pharmacokinet.*, **1993**, 25(1), 6-19.  
Wadworth, A.N.; Goa, K.L. Lomefloxacin. A review of its antibacterial activity, pharmacokinetic properties and therapeutic use. *Drugs*, **1991**, 42(6), 1018-60.  
Nightingale, C.H. Overview of the pharmacokinetics of fleroxacin. *Am. J. Med.*, **1993**, 94(3A), 38S-43S.  
Neu, H.C.; Fang, W.; Gu, J.W.; Chin, N.X. *In vitro* activity of OPC-17116. *Antimicrob. Agents Chemother.*, **1992**, 36(6), 1310-5.  
Kim, J.H.; Choi, K.H.; Kim, J.W.; Lee, J.H.; Choi, E.C.; Kim, B.K. *In-vitro* and *in-vivo* antibacterial activity of CFC-222, a new fluoroquinolone. *J. Antimicrob. Chemother.*, **1998**, 41(2), 223-9.  
Clement, J.J.; Tanaka, S.K.; Alder, J.; Vojtko, C.; Beyer, J.; Hensey, D.; Ramer, N.; McDaniel, D.; Chu, D.T. *In vitro* and *in vivo* evaluations of A-80556, a new fluoroquinolone. *Antimicrob. Agents Chemother.*, **1994**, 38(5), 1071-8.  
Bongaerts, G.P.A.; Hoogkamp, J.A.A. *In vitro* activities of BAY Y3118, ciprofloxacin, ofloxacin, and fleroxacin against gram-positive and gram-negative pathogens from respiratory tract and soft tissue infections. *Antimicrob. Agents Chemother.*, **1993**, 37(9), 2017-9.  
Venezia, R.A.; Prymas, L.A.; Shayegani, A.; Yocum, D.M. *In vitro* activities of amifloxacin and two of its metabolites. *Antimicrob. Agents Chemother.*, **1989**, 33(5), 762-6.

Merafloxacin

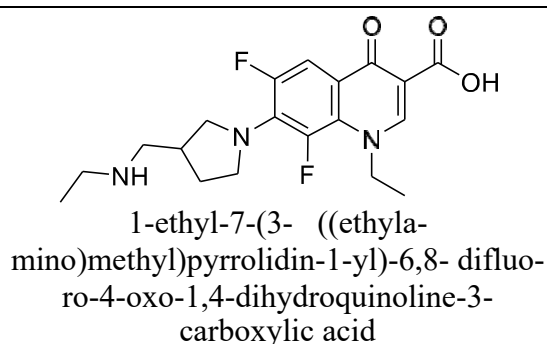

Chapman, J.S.; Georgopadakou, N.H. Routes of quinolone permeation in *Escherichia coli*. *Antimicrob. Agents Chemother.*, **1988**, 32(4), 438-42.

Moxifloxacin

Stass, H.; Dalhoff, A.; Kubitz, D.; Schühly, U. Pharmacokinetics, safety, and tolerability of ascending single doses of moxifloxacin, a new 8-methoxy quinolone, administered to healthy



1-cyclopropyl-6-fluoro-7-((4aR,7aR)-hexahydro-1H-pyrrolo[3,4-b]pyridin-6(2H)-yl)-8-methoxy-4-oxo-1,4-dihydroquinoline-3-carboxylic acid

subjects. *Antimicrob. Agents Chemother.*, **1998**, 42(8), 2060-5.

Siefert, H.M.; Domdey-Bette, A.; Henninger, K.; Hucke, F.; Kohlsdorfer, A.; Stass, H.H. Pharmacokinetics of the 8-methoxyquinolone, moxifloxacin: a comparison in humans and other mammalian species. *J. Antimicrob. Chemother.*, **1999**, 43(SB), 69-76.

Stass, H.; Kubitz, D. Pharmacokinetics and elimination of moxifloxacin after oral and intravenous administration in man. *J. Antimicrob. Chemother.*, **1999**, 43(SB), 83-90.

Stass, H.; Kubitz, D.; Halabi, A.; Delesen, H. Pharmacokinetics of moxifloxacin, a novel 8-methoxyquinolone, in patients with renal dysfunction. *Br. J. Clin. Pharmacol.*, **2002**, 53(3), 232-7.

Burkhardt, O.; Borner, K.; Stass, H.; Beyer, G.; Allewelt, M.; Nord, C.E.; Lode, H. Single- and multiple-dose pharmacokinetics of oral moxifloxacin and clarithromycin, and concentrations in serum, saliva and faeces. *Scand. J. Infect. Dis.*, **2002**, 34(12), 898-903.

Stass, H.; Schühly, U.; Möller, J.G.; Delesen, H. Effects of sucralfate on the oral bioavailability of moxifloxacin, a novel 8-methoxyfluoroquinolone, in healthy volunteers. *Clin. Pharmacokinet.*, **2001**, 40(S1), 49-55.

Stass, H.; Kubitz, D. Effects of iron

supplements on the oral bioavailability of moxifloxacin, a novel 8-methoxyfluoroquinolone, in humans. *Clin. Pharmacokinet.*, **2001**, 40(S1), 57-62.

Stass, H.; Kubitz, D. Effects of dairy products on the oral bioavailability of moxifloxacin, a novel 8-methoxyfluoroquinolone, in healthy volunteers. *Clin. Pharmacokinet.*, **2001**, 40(S1), 33-8.

Stass, H.; Wandel, C.; Delesen, H.; Möller, J.G. Effect of calcium supplements on the oral bioavailability of moxifloxacin in healthy male volunteers. *Clin. Pharmacokinet.*, **2001**, 40(S1), 27-

32.  
 Lubasch, A.; Keller, I.; Borner, K.; Koeppe, P.; Lode, H. Comparative pharmacokinetics of ciprofloxacin, gatifloxacin, grepafloxacin, levofloxacin, trovafloxacin, and moxifloxacin after single oral administration in healthy volunteers. *Antimicrob. Agents Chemother.*, **2000**, 44(10), 2600-3.  
 Tanaka, M.; Yamazaki, E.; Chiba, M.; Yoshihara, K.; Akasaka, T.; Takemura, M.; Sato, K. *In vitro* antibacterial activities of DQ-113, a potent quinolone, against clinical isolates. *Antimicrob. Agents Chemother.*, **2002**, 46(3), 904-8.  
 Montanari, M.P.; Mingoia, M.; Varaldo, P.E. *In vitro* antibacterial activities of AF 3013, the active metabolite of prulifloxacin, against nosocomial and community Italian isolates. *Antimicrob. Agents Chemother.*, **2001**, 45(12), 3616-22.  
 Brueggemann, A.B.; Kugler, K.C.; Doern, G.V. *In vitro* activity of BAY 12-8039, a novel 8-methoxyquinolone, compared to activities of six fluoroquinolones against *Streptococcus pneumoniae*, *Haemophilus influenzae*, and *Moraxella catarrhalis*. *Antimicrob. Agents Chemother.*, **1997**, 41(7), 1594-7.

|             |                                                                                                                                                                             |                                                                                                                                                                                                                                                                                                                                                                                                                                                                                                                                                                                                                                                                                                                                                                                                                                                                                                                                                                                                                                                                                                                                                                                                                                                                                                                                                                                                                                                                                                                                                                                                                                                             |
|-------------|-----------------------------------------------------------------------------------------------------------------------------------------------------------------------------|-------------------------------------------------------------------------------------------------------------------------------------------------------------------------------------------------------------------------------------------------------------------------------------------------------------------------------------------------------------------------------------------------------------------------------------------------------------------------------------------------------------------------------------------------------------------------------------------------------------------------------------------------------------------------------------------------------------------------------------------------------------------------------------------------------------------------------------------------------------------------------------------------------------------------------------------------------------------------------------------------------------------------------------------------------------------------------------------------------------------------------------------------------------------------------------------------------------------------------------------------------------------------------------------------------------------------------------------------------------------------------------------------------------------------------------------------------------------------------------------------------------------------------------------------------------------------------------------------------------------------------------------------------------|
|             | 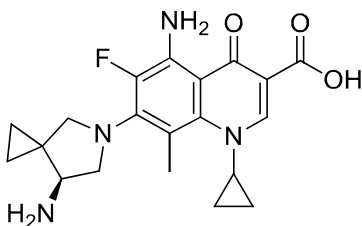                                                                                         | <p>Hoellman, D.B.; Kelly, L.M.; Jacobs, M.R.; Appelbaum, P.C. Comparative antianaerobic activity of BMS 284756. <i>Antimicrob. Agents Chemother.</i>, <b>2001</b>, 45(2), 589-92.</p> <p>Snydman, D.R.; Jacobus, N.V.; McDermott, L.A.; Ruthazer, R.; Goldstein, E.; Finegold, S.; Harrell, L.; Hecht, D.W.; Jenkins, S.; Pierson, C.; Venezia, R.; Rihs, J.; Gorbach, S.L. <i>In vitro</i> activities of newer quinolones against bacteroides group organisms. <i>Antimicrob. Agents Chemother.</i>, <b>2002</b>, 46(10), 3276-9.</p> <p>Milatovic, D.; Schmitz, F.J.; Brisse, S.; Verhoef, J.; Fluit, A.C. <i>In vitro</i> activities of sitafloxacin (DU-6859a) and six other fluoroquinolones against 8,796 clinical bacterial isolates. <i>Antimicrob. Agents Chemother.</i>, <b>2000</b>, 44(4), 1102-7.</p> <p>Almer, L.S.; Hoffrage, J.B.; Keller, E.L.; Flamm, R.K.; Shortridge, V.D. <i>In vitro</i> and bactericidal activities of ABT- 492, a novel fluoroquinolone, against Gram-positive and Gram-negative organisms. <i>Antimicrob. Agents Chemother.</i>, <b>2004</b>, 48(7), 2771-7.</p> <p>Yong, D.E.; Cheong, H.J.; Kim, Y.S.; Park, Y.J.; Kim, W.J.; Woo, J.H.; Lee, K.W.; Kang, M.W.; Choo, Y.S. <i>In vitro</i> activity of gemifloxacin against recent clinical isolates of bacteria in Korea. <i>J. Korean Med. Sci.</i>, <b>2002</b>, 17(6), 737-42.</p> <p>Otani, T.; Tanaka, M.; Ito, E.; Kurosaka, Y.; Murakami, Y.; Onodera, K.; Akasaka, T.; Sato, K. <i>In vitro</i> and <i>in vivo</i> antibacterial activities of DK-507k, a novel fluoroquinolone. <i>Antimicrob. Agents Chemother.</i>, <b>2003</b>, 47(12), 3750-9.</p> |
| Norfloxacin |  <p>1-ethyl-6-fluoro-4-oxo-7-(piperazin-1-yl)-1,4-dihydroquinoline-3-carboxylic acid</p> | <p>Nightingale, C.H. Overview of the pharmacokinetics of fleroxacin. <i>Am. J. Med.</i>, <b>1993</b>, 94(3A), 38S-43S.</p> <p>Coll, R.; Gargallo-Viola, D.; Tudela, E.; Xicota, M.A.; Llovera, S.; Guinea, J. Antibacterial activity and pharmacokinetics of four new 7-azetidinyl fluoroquinolones.</p>                                                                                                                                                                                                                                                                                                                                                                                                                                                                                                                                                                                                                                                                                                                                                                                                                                                                                                                                                                                                                                                                                                                                                                                                                                                                                                                                                    |
|             |                                                                                                                                                                             | <p><i>Antimicrob. Agents Chemother.</i>, <b>1996</b>, 40(1), 274-7.</p>                                                                                                                                                                                                                                                                                                                                                                                                                                                                                                                                                                                                                                                                                                                                                                                                                                                                                                                                                                                                                                                                                                                                                                                                                                                                                                                                                                                                                                                                                                                                                                                     |

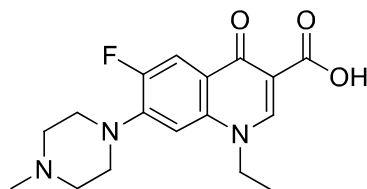

|               |                                                                                                                                        |                                                                                                                                                                                                                                                                                                                                                                                                                                                                                                                                                                                                                                                                                                                                                                                                                                                                                                                                                                                                                                                                                                                                                                                                              |
|---------------|----------------------------------------------------------------------------------------------------------------------------------------|--------------------------------------------------------------------------------------------------------------------------------------------------------------------------------------------------------------------------------------------------------------------------------------------------------------------------------------------------------------------------------------------------------------------------------------------------------------------------------------------------------------------------------------------------------------------------------------------------------------------------------------------------------------------------------------------------------------------------------------------------------------------------------------------------------------------------------------------------------------------------------------------------------------------------------------------------------------------------------------------------------------------------------------------------------------------------------------------------------------------------------------------------------------------------------------------------------------|
|               |                                                                                                                                        | <p>Cunha, B.A.; Qadri, S.M.; Ueno, Y.; Walters, E.A.; Domenico, P. Antibacterial activity of trovafloxacin against nosocomial Gram-positive and Gram-negative isolates. <i>J. Antimicrob. Chemother.</i>, <b>1997</b>, 39(SB), 29-34.</p> <p>Jones, R.N.; Barry, A.L. <i>In vitro</i> evaluation of WIN 57273, a new broad-spectrum fluoroquinolone. <i>Antimicrob. Agents Chemother.</i>, <b>1990</b>, 34(2), 306-13.</p> <p>García-Rodríguez, J.A.; García Sánchez, J.E.; Muñoz Bellido, J.L.; Trujillano, I. <i>In vitro</i> activities of irloxacin and E-3846, two new quinolones. <i>Antimicrob. Agents Chemother.</i>, <b>1990</b>, 34(6), 1262-7.</p> <p>Gooding, B.B.; Jones, R.N. <i>In vitro</i> antimicrobial activity of CP-99,219, a novel azabicyclo-naphthyridone. <i>Antimicrob. Agents Chemother.</i>, <b>1993</b>, 37(2), 349-53.</p> <p>Golan, Y.; McDermott, L.A.; Jacobus, N.V.; Goldstein, E.J.; Finegold, S.; Harrell, L.J.; Hecht, D.W.; Jenkins, S.G.; Pierson, C.; Venezia, R.; Rihs, J.; Iannini, P.; Gorbach, S.L.; Snyderman, D.R. Emergence of fluoroquinolone resistance among <i>Bacteroides</i> species. <i>J. Antimicrob. Chemother.</i>, <b>2003</b>, 52(2), 208-13.</p> |
| Olamufloxacin | <p>(S)-5-amino-7-(7-amino-5-azaspiro[2.4]heptan-5-yl)-1-cyclopropyl-6-fluoro-8-methyl-4-oxo-1,4-dihydroquinoline-3-carboxylic acid</p> | <p>Sun, J.; Deguchi, Y.; Chen, J.M.; Zhang, R.H.; Morimoto, K. Interactions between quinolone antibiotics and phospholipid membrane for prediction of alveolar macrophage uptake <i>in vitro</i>. <i>Acta Pharmacol. Sin.</i>, <b>2002</b>, 23(5), 430-8.</p> <p>Takahashi, Y.; Masuda, N.; Otsuki, M.; Miki, M.; Nishino, T. <i>In vitro</i> activity of HSR-903, a new quinolone. <i>Antimicrob. Agents Chemother.</i>, <b>1997</b>, 41(6), 1326-30.</p>                                                                                                                                                                                                                                                                                                                                                                                                                                                                                                                                                                                                                                                                                                                                                   |

|              |                                                                                                                                                                                                                       |                                                                                                                                                                                                                                                                                                                                                                                                                                                                                                                                                                                                                                                                                                                                                                                                                                                                                                                                                                                                                                                                                                                                                                                                                                                                                                                                                                                   |
|--------------|-----------------------------------------------------------------------------------------------------------------------------------------------------------------------------------------------------------------------|-----------------------------------------------------------------------------------------------------------------------------------------------------------------------------------------------------------------------------------------------------------------------------------------------------------------------------------------------------------------------------------------------------------------------------------------------------------------------------------------------------------------------------------------------------------------------------------------------------------------------------------------------------------------------------------------------------------------------------------------------------------------------------------------------------------------------------------------------------------------------------------------------------------------------------------------------------------------------------------------------------------------------------------------------------------------------------------------------------------------------------------------------------------------------------------------------------------------------------------------------------------------------------------------------------------------------------------------------------------------------------------|
| Pazufloxacin | 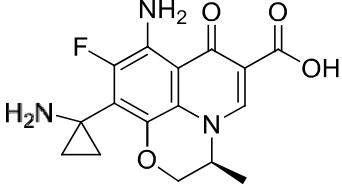 <p>(S)-8-amino-10-(1-aminocyclopropyl)-9-fluoro-3-methyl-7-oxo-3,7-dihydro-2H-[1,4]oxazino[2,3,4-ij]quinoline-6-carboxylic acid</p> | <p>Saito, A. Pharmacokinetics of T-3761 in healthy volunteers. <i>Drugs</i>, <b>1995</b>, 49(S2), 335-6.</p> <p>Fukuoka, Y.; Ikeda, Y.; Yamashiro, Y.; Takahata, M.; Todo, Y.; Narita, H. <i>In vitro</i> and <i>in vivo</i> antibacterial activities of T-3761, a new quinolone derivative. <i>Antimicrob. Agents Chemother.</i>, <b>1993</b>, 37(3), 384-92.</p>                                                                                                                                                                                                                                                                                                                                                                                                                                                                                                                                                                                                                                                                                                                                                                                                                                                                                                                                                                                                                |
| Pefloxacin   | <p>1-ethyl-6-fluoro-7-(4-methylpiperazin-1-yl)-4-oxo-1,4-dihydroquinoline-3-carboxylic acid</p>                                                                                                                       | <p>Petitjean, O.; Pangon, B.; Brion, N.; Tod, M.; Chaplain, C.; Le Gros, V.; Louchahi, K.; Allouch, P. Pharmacokinetics and bactericidal activities of one 800-milligram dose versus two 400-milligram doses of intravenously administered pefloxacin in healthy volunteers. <i>Antimicrob. Agents Chemother.</i>, <b>1993</b>, 37(4), 737-40.</p> <p>Barre, J.; Houin, G.; Tillement, J.P. Dose-dependent pharmacokinetic study of pefloxacin, a new antibacterial agent, in humans. <i>J. Pharm. Sci.</i>, <b>1984</b>, 73(10), 1379-82.</p> <p>Höffler, D.; Schäfer, I.; Koeppe, P.; Sörgel, F. Pharmacokinetics of pefloxacin in normal and impaired renal function. <i>Arzneimittelforschung</i>, <b>1988</b>, 38(5), 739-43.</p> <p>Cardey, J.; Silvain, C.; Bouquet, S.; Breux, J.P.; Becq-Giraudon, B.; Fourtillan, J.P.; Beauchant, M. Oral pharmacokinetics and ascitic fluid penetration of pefloxacin in cirrhosis. <i>Eur. J. Clin. Pharmacol.</i>, <b>1987</b>, 33(5), 469-72.</p> <p>Neuman, M. Clinical pharmacokinetics of the newer antibacterial 4-quinolones. <i>Clin. Pharmacokinet.</i>, <b>1988</b>, 14(2), 96-121.</p> <p>García-Rodríguez, J.A.; García Sánchez, J.E.; Muñoz Bellido, J.L.; Trujillano, I. <i>In vitro</i> activities of irloxacin and E-3846, two new quinolones. <i>Antimicrob. Agents Chemother.</i>, <b>1990</b>, 34(6), 1262-7.</p> |

|               |                                                                                                                                                                                                             |                                                                                                                                                                                                                                                                                                                                                                                                                                                                                                                                                                                                                                                                                                                                                            |
|---------------|-------------------------------------------------------------------------------------------------------------------------------------------------------------------------------------------------------------|------------------------------------------------------------------------------------------------------------------------------------------------------------------------------------------------------------------------------------------------------------------------------------------------------------------------------------------------------------------------------------------------------------------------------------------------------------------------------------------------------------------------------------------------------------------------------------------------------------------------------------------------------------------------------------------------------------------------------------------------------------|
| PGE-4175997   | 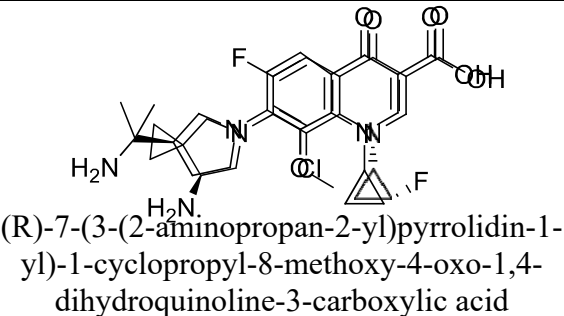 <p>(R)-7-(3-(2-aminopropan-2-yl)pyrrolidin-1-yl)-1-cyclopropyl-8-methoxy-4-oxo-1,4-dihydroquinoline-3-carboxylic acid</p> | <p>Barry, A.L.; Fuchs, P.C.; Brown, S.D. <i>In vitro</i> activities of three nonfluorinated quinolones against representative bacterial isolates. <i>Antimicrob. Agents Chemother.</i>, <b>2001</b>, 45(6), 1923-7.</p> <p>Roychoudhury, S.; Twinem, T.L.; Makin, K.M.; McIntosh, E.J.; Ledoussal, B.; Catrenich, C.E. Activity of non-fluorinated quinolones (NFQs) against quinolone-resistant <i>Escherichia coli</i> and <i>Streptococcus pneumoniae</i>. <i>J. Antimicrob. Chemother.</i>, <b>2001</b>, 48(1), 29-36.</p>                                                                                                                                                                                                                             |
| PGE-9262932   |  <p>7-((R)-3-((S)-1-aminoethyl)pyrrolidin-1-yl)-1-cyclopropyl-8-methoxy-4-oxo-1,4-dihydroquinoline-3-carboxylic acid</p>  | Same as for PGE-4175997                                                                                                                                                                                                                                                                                                                                                                                                                                                                                                                                                                                                                                                                                                                                    |
| PGE-9509924   |  <p>(S)-7-(3-aminopiperidin-1-yl)-1-cyclopropyl-8-methoxy-4-oxo-1,4-dihydroquinoline-3-carboxylic acid</p>               | Same as for PGE-4175997                                                                                                                                                                                                                                                                                                                                                                                                                                                                                                                                                                                                                                                                                                                                    |
| Rufloxacin    |  <p>9-fluoro-10-(4-methylpiperazin-1-yl)-7-oxo-3,7-dihydro-2H-[1,4]thiazino[2,3,4-ij]quinoline-6-carboxylic acid</p>     | <p>Imbimbo, B.P.; Broccali, G.; Cesana, M.; Crema, F.; Attardo-Parrinello, G. Inter- and intrasubject variabilities in the pharmacokinetics of rufloxacin after single oral administration to healthy volunteers. <i>Antimicrob. Agents Chemother.</i>, <b>1991</b>, 35(2), 390-3.</p> <p>Perry, G.; Mant, T.G.; Morrison, P.J.; Sacks, S.; Woodcock, J.; Wise, R.; Imbimbo, B.P. Pharmacokinetics of rufloxacin in patients with impaired renal function. <i>Antimicrob. Agents Chemother.</i>, <b>1993</b>, 37(4), 637-41.</p> <p>Choi, K.H.; Hong, J.S.; Kim, S.K.; Lee, D.K.; Yoon, S.J.; Choi, E.C. <i>In-vitro</i> and <i>in-vivo</i> activities of DW-116, a new fluoroquinolone. <i>J. Antimicrob. Chemother.</i>, <b>1997</b>, 39(4), 509-14.</p> |
| Sitaflloxacin |                                                                                                                                                                                                             | Nakashima, M.; Uematsu, T.; Kosuge,                                                                                                                                                                                                                                                                                                                                                                                                                                                                                                                                                                                                                                                                                                                        |

7-((S)-7-amino-5-azaspiro[2.4]heptan-5-yl)-  
8-chloro-6-fluoro-1-((1S,2R)-2-  
fluorocyclopropyl)-4-oxo-1,4- di-  
hydroquinoline-3-carboxylic acid

K.; Umemura, K.; Hakusui, H.; Tanaka, M. Pharmacokinetics and tolerance of DU-6859a, a new fluoroquinolone, after single and multiple oral doses in healthy volunteers. *Antimicrob. Agents Chemother.*, **1995**, 39(1), 170-4.

O'Grady, J.; Briggs, A.; Atarashi, S.; Kobayashi, H.; Smith, R.L.; Ward, J.; Ward, C.; Milatovic, D. Pharmacokinetics and absolute bioavailability of sitafloxacin, a new fluoroquinolone antibiotic, in healthy male and female Caucasian subjects. *Xenobiotica*, **2001**, 31(11), 811-22.

Tanaka, M.; Yamazaki, E.; Chiba, M.; Yoshihara, K.; Akasaka, T.; Takemura, M.; Sato, K. *In vitro* antibacterial activities of DQ-113, a potent quinolone, against clinical isolates. *Antimicrob. Agents Chemother.*, **2002**, 46(3), 904-8.

Korten, V.; Tomayko, J.F.; Murray, B.E. Comparative *in vitro* activity of DU-6859a, a new fluoroquinolone agent, against gram-positive cocci. *Antimicrob. Agents Chemother.*, **1994**, 38(3), 611-5.

Snyderman, D.R.; Jacobus, N.V.; McDermott, L.A.; Ruthazer, R.; Goldstein, E.; Finegold, S.; Harrell, L.; Hecht, D.W.; Jenkins, S.; Pierson, C.; Venezia, R.; Rihs, J.; Gorbach, S.L. *In vitro* activities of newer quinolones against bacteroides group organisms. *Antimicrob. Agents Chemother.*, **2002**, 46(10), 3276-9.

Milatovic, D.; Schmitz, F.J.; Brisse, S.; Verhoef, J.; Fluit, A.C. *In vitro* activities of sitafloxacin (DU-6859a) and six other fluoroquinolones against 8,796 clinical bacterial isolates. *Antimicrob. Agents Chemother.*, **2000**, 44(4), 1102-7.

Otani, T.; Tanaka, M.; Ito, E.; Kurosaka, Y.; Murakami, Y.; Onodera, K.; Akasaka, T.; Sato, K. *In vitro* and *in vivo* antibacterial activities of DK-507k, a novel fluoroquinolone. *Antimicrob. Agents Chemother.*, **2003**, 47(12), 3750-

|              |                                                                                                                                                                                                                 |                                                                                                                                                                                                                                                                                                                                                                                                                                                                                                                                                                                                                                                                                                                                                                                                                                                                                                                                                                                                                                                                                                                                                                                                                                                                                                                                                                                                                                                                                                                                                                                                                                                                                                                                                                                                                                  |
|--------------|-----------------------------------------------------------------------------------------------------------------------------------------------------------------------------------------------------------------|----------------------------------------------------------------------------------------------------------------------------------------------------------------------------------------------------------------------------------------------------------------------------------------------------------------------------------------------------------------------------------------------------------------------------------------------------------------------------------------------------------------------------------------------------------------------------------------------------------------------------------------------------------------------------------------------------------------------------------------------------------------------------------------------------------------------------------------------------------------------------------------------------------------------------------------------------------------------------------------------------------------------------------------------------------------------------------------------------------------------------------------------------------------------------------------------------------------------------------------------------------------------------------------------------------------------------------------------------------------------------------------------------------------------------------------------------------------------------------------------------------------------------------------------------------------------------------------------------------------------------------------------------------------------------------------------------------------------------------------------------------------------------------------------------------------------------------|
| Sparfloxacin | 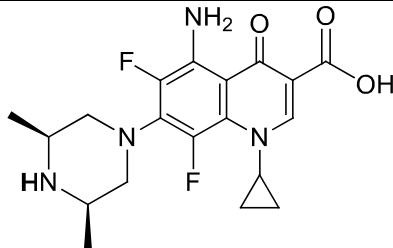 <p>5-amino-1-cyclopropyl-7-((3S,5R)-3,5-dimethylpiperazin-1-yl)-6,8-difluoro-4-oxo-1,4-dihydroquinoline-3-carboxylic acid</p> | <p>Trautmann, M.; Ruhnke, M.; Borner, K.; Wagner, J.; Koeppe, P. Pharmacokinetics of sparfloxacin and serum bactericidal activity against pneumococci. <i>Antimicrob. Agents Chemother.</i>, <b>1996</b>, 40(3), 776-9.</p> <p>Zix, J.A.; Geerdes-Fenge, H.F.; Rau, M.; Vöckler, J.; Borner, K.; Koeppe, P.; Lode, H. Pharmacokinetics of sparfloxacin and interaction with cisapride and sucralfate. <i>Antimicrob. Agents Chemother.</i>, <b>1997</b>, 41(8), 1668-72.</p> <p>Shimada, J.; Nogita, T.; Ishibashi, Y. Clinical pharmacokinetics of sparfloxacin. <i>Clin. Pharmacokinet.</i>, <b>1993</b>, 25(5), 358-69.</p> <p>Ritz, M.; Lode, H.; Fassbender, M.; Borner, K.; Koeppe, P.; Nord, C.E. Multiple-dose pharmacokinetics of sparfloxacin and its influence on fecal flora. <i>Antimicrob. Agents Chemother.</i>, <b>1994</b>, 38(3), 455-9.</p> <p>Goa, K.L.; Bryson, H.M.; Markham, A. Sparfloxacin. A review of its antibacterial activity, pharmacokinetic properties, clinical efficacy and tolerability in lower respiratory tract infections. <i>Drugs</i>, <b>1997</b>, 53(4), 700-25.</p> <p>Gries, J.M.; Honorato, J.; Taburet, A.M.; Alvarez, M.P.; Sadaba, B.; Azanza, J.R.; Singlas, E. Cimetidine does not alter sparfloxacin pharmacokinetics. <i>Int. J. Clin. Pharmacol. Ther.</i>, <b>1995</b>, 33(11), 585-7.</p> <p>Montay, G.; Bruno, R.; Vergniol, J.C.; Ebmeier, M.; Le Roux, Y.; Guimart, C.; Frydman, A.; Chassard, D.; Thebault, J.J. Pharmacokinetics of sparfloxacin in humans after single oral administration at doses of 200, 400, 600, and 800 mg. <i>J. Clin. Pharmacol.</i>, <b>1994</b>, 34(11), 1071-6.</p> <p>Cormican, M.G.; Jones, R.N. Antimicrobial activity and spectrum of LB20304, a novel fluoronaphthyridone. <i>Antimicrob. Agents Chemother.</i>, <b>1997</b>,</p> |
|              |                                                                                                                                                                                                                 | <p>of LB20304, a novel fluoronaphthyridone. <i>Antimicrob. Agents Chemother.</i>, <b>1997</b>,</p>                                                                                                                                                                                                                                                                                                                                                                                                                                                                                                                                                                                                                                                                                                                                                                                                                                                                                                                                                                                                                                                                                                                                                                                                                                                                                                                                                                                                                                                                                                                                                                                                                                                                                                                               |



|  |  |                                                                                                                                                                                                                                                                                                                                                                                                                                                                                                                                                                                                                                                                                                                                                                                                                                                                                                                                                                                                                                                                                                                                                                                                                                                                                                                                                                                                                                                                                                                                                                                                                                                                                     |
|--|--|-------------------------------------------------------------------------------------------------------------------------------------------------------------------------------------------------------------------------------------------------------------------------------------------------------------------------------------------------------------------------------------------------------------------------------------------------------------------------------------------------------------------------------------------------------------------------------------------------------------------------------------------------------------------------------------------------------------------------------------------------------------------------------------------------------------------------------------------------------------------------------------------------------------------------------------------------------------------------------------------------------------------------------------------------------------------------------------------------------------------------------------------------------------------------------------------------------------------------------------------------------------------------------------------------------------------------------------------------------------------------------------------------------------------------------------------------------------------------------------------------------------------------------------------------------------------------------------------------------------------------------------------------------------------------------------|
|  |  | <p>41(1), 204-11.</p> <p>Goldstein, E.J.; Citron, D.M.; Hunt Gerardo, S.; Hudspeth, M.; Merriam, C.V.</p> <p>Comparative <i>in vitro</i> activities of DU-6859a, levofloxacin, ofloxacin, sparfloxacin, and ciprofloxacin against 387 aerobic and anaerobic bite wound isolates. <i>Antimicrob. Agents Chemother.</i>, <b>1997</b>, 41(5), 1193-5.</p> <p>Tanaka, M.; Yamazaki, E.; Chiba, M.; Yoshihara, K.; Akasaka, T.; Takemura, M.; Sato, K. <i>In vitro</i> antibacterial activities of DQ-113, a potent quinolone, against clinical isolates. <i>Antimicrob. Agents Chemother.</i>, <b>2002</b>, 46(3), 904-8.</p> <p>Goldstein, E.J.; Citron, D.M.; Hudspeth, M.; Hunt Gerardo, S.; Merriam, C.V.</p> <p><i>In vitro</i> activity of Bay 12-8039, a new 8-methoxyquinolone, compared to the activities of 11 other oral antimicrobial agents against 390 aerobic and anaerobic bacteria isolated from human and animal bite wound skin and soft tissue infections in humans. <i>Antimicrob. Agents Chemother.</i>, <b>1997</b>, 41(7), 1552-7.</p> <p>Brueggemann, A.B.; Kugler, K.C.; Doern, G.V.</p> <p><i>In vitro</i> activity of BAY 12-8039, a novel 8-methoxyquinolone, compared to activities of six fluoroquinolones against <i>Streptococcus pneumoniae</i>, <i>Haemophilus influenzae</i>, and <i>Moraxella catarrhalis</i>. <i>Antimicrob. Agents Chemother.</i>, <b>1997</b>, 41(7), 1594-7.</p> <p>Yun, H.J.; Min, Y.H.; Lim, J.A.; Kang, J.W.; Kim, S.Y.; Kim, M.J.; Jeong, J.H.; Choi, Y.J.; Kwon, H.J.; Jung, Y.H.; Shim, M.J.; Choi, E.C. <i>In vitro</i> and <i>in vivo</i> antibacterial activities of DW286, a new fluoronaphthyridone antibiotic.</p> |
|  |  | <p><i>Antimicrob. Agents Chemother.</i>, <b>2002</b>, 46(9), 3071-4.</p> <p>Montanari, M.P.; Mingoia, M.; Varaldo, P.E. <i>In vitro</i> antibacterial activities of AF 3013, the active metabolite of</p>                                                                                                                                                                                                                                                                                                                                                                                                                                                                                                                                                                                                                                                                                                                                                                                                                                                                                                                                                                                                                                                                                                                                                                                                                                                                                                                                                                                                                                                                           |

prulifloxacin, against nosocomial and community Italian isolates. *Antimicrob. Agents Chemother.*, **2001**, 45(12), 3616-22.

Neu, H.C.; Chin, N.X. *In vitro* activity of the new fluoroquinolone CP-99,219. *Antimicrob. Agents Chemother.*, **1994**, 38(11), 2615-22.

Jones, R.N.; Croco, M.A.; Pfaller, M.A.; Beach, M.L.; Kugler, K.C. Antimicrobial activity evaluations of gatifloxacin, a new fluoroquinolone: contemporary pathogen results from a global antimicrobial resistance surveillance program (SENTRY, 1997). *Clin. Microbiol. Infect.*, **1999**, 5(9), 540-6.

Kim, J.H.; Choi, K.H.; Kim, J.W.; Lee, J.H.; Choi, E.C.; Kim, B.K. *In-vitro* and *in-vivo* antibacterial activity of CFC-222, a new fluoroquinolone. *J. Antimicrob. Chemother.*, **1998**, 41(2), 223-9.

Choi, K.H.; Hong, J.S.; Kim, S.K.; Lee, D.K.; Yoon, S.J.; Choi, E.C. *In-vitro* and *in-vivo* activities of DW-116, a new fluoroquinolone. *J. Antimicrob. Chemother.*, **1997**, 39(4), 509-14.

Clement, J.J.; Tanaka, S.K.; Alder, J.; Vojtko, C.; Beyer, J.; Hensey, D.; Ramer, N.; McDaniel, D.; Chu, D.T. *In vitro* and *in vivo* evaluations of A-80556, a new fluoroquinolone. *Antimicrob. Agents Chemother.*, **1994**, 38(5), 1071-8.

Chin, N.X.; Gu, J.W.; Yu, K.W.; Zhang, Y.X.; Neu, H.C. *In vitro* activity of sparfloxacin. *Antimicrob. Agents Chemother.*, **1991**, 35(3), 567-71.

Borobio, M.V.; Conejo, M.; Ramirez, E.; Suarez, A.I.; Perea, E.J. Comparative activities of eight quinolones against members of the *Bacteroides fragilis*

|              |                                                                                                                                                                                                  |                                                                                                                                                                                                                                                                                                                                                                                                                                                                                                                                                                                                                                                                                                                                                                                                                                                                                                                                                                                                                                                                                                                                                                                                                                                                                                                                                                                          |
|--------------|--------------------------------------------------------------------------------------------------------------------------------------------------------------------------------------------------|------------------------------------------------------------------------------------------------------------------------------------------------------------------------------------------------------------------------------------------------------------------------------------------------------------------------------------------------------------------------------------------------------------------------------------------------------------------------------------------------------------------------------------------------------------------------------------------------------------------------------------------------------------------------------------------------------------------------------------------------------------------------------------------------------------------------------------------------------------------------------------------------------------------------------------------------------------------------------------------------------------------------------------------------------------------------------------------------------------------------------------------------------------------------------------------------------------------------------------------------------------------------------------------------------------------------------------------------------------------------------------------|
|              | 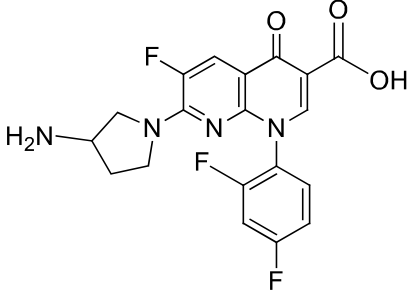                                                                                                                | <p>group. <i>Antimicrob. Agents Chemother.</i>, <b>1994</b>, 38(6), 1442-5.</p> <p>Wexler, H.M.; Molitoris, E.; Finegold, S.M. <i>In vitro</i> activity of BayY3118 against anaerobic bacteria. <i>Antimicrob. Agents Chemother.</i>, <b>1993</b>, 37(11), 2509-13.</p> <p>Goldstein, E.J.; Citron, D.M. Comparative activity of ciprofloxacin, ofloxacin, sparfloxacin, temafloxacin, CI-960, CI-990, and WIN 57273 against anaerobic bacteria. <i>Antimicrob. Agents Chemother.</i>, <b>1992</b>, 36(5), 1158-62.</p>                                                                                                                                                                                                                                                                                                                                                                                                                                                                                                                                                                                                                                                                                                                                                                                                                                                                  |
| Temafloxacin |  <p>1-(2,4-difluorophenyl)-6-fluoro-7-(3-methylpiperazin-1-yl)-4-oxo-1,4-dihydroquinoline-3-carboxylic acid</p> | <p>Granneman, G.R.; Braeckman, R.; Kraut, J.; Shupien, S.; Craft, J.C. Temafloxacin pharmacokinetics in subjects with normal and impaired renal function. <i>Antimicrob. Agents Chemother.</i>, <b>1991</b>, 35(11), 2345-51.</p> <p>Granneman, G.R.; Carpentier, P.; Morrison, P.J.; Pernet, A.G. Pharmacokinetics of temafloxacin in humans after single oral doses. <i>Antimicrob. Agents Chemother.</i>, <b>1991</b>, 35(3), 436-41.</p> <p>Andersson, M.I.; MacGowan, A.P. Development of the quinolones. <i>J Antimicrob Chemother.</i>, <b>2003</b>, 51(S1), 1-11.</p> <p>Piddock, L.J.; Jin, Y.F.; Griggs, D.J. Effect of hydrophobicity and molecular mass on the accumulation of fluoroquinolones by <i>Staphylococcus aureus</i>. <i>J. Antimicrob. Chemother.</i>, <b>2001</b>, 47(3), 261-70.</p> <p>Neu, H.C.; Chin, N.X. <i>In vitro</i> activity of the new fluoroquinolone CP-99,219. <i>Antimicrob. Agents Chemother.</i>, <b>1994</b>, 38(11), 2615-22.</p> <p>Neu, H.C.; Fang, W.; Gu, J.W.; Chin, N.X. <i>In vitro</i> activity of OPC-17116. <i>Antimicrob. Agents Chemother.</i>, <b>1992</b>, 36(6), 1310-5.</p> <p>Goldstein, E.J.; Citron, D.M. Comparative activity of ciprofloxacin, ofloxacin, sparfloxacin, temafloxacin, CI-960, CI-990, and WIN 57273 against anaerobic bacteria. <i>Antimicrob. Agents Chemother.</i>, <b>1992</b>, 36(5), 1158-62.</p> |
| Tosufloxacin |                                                                                                                                                                                                  | <p>Minami, R.; Nakamura, C.; Inotsume,</p>                                                                                                                                                                                                                                                                                                                                                                                                                                                                                                                                                                                                                                                                                                                                                                                                                                                                                                                                                                                                                                                                                                                                                                                                                                                                                                                                               |

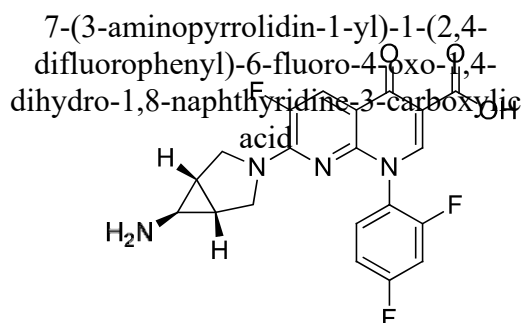

N.; Nakano, M. Effects of aluminum hydroxide and famotidine on bioavailability of tosufloxacin in healthy volunteers. *Antimicrob. Agents Chemother.*, **1998**, 42(2), 453-5.

Minami, R.; Inotsume, N.; Nakamura, C.; Nakano, M. Stereoselective analysis of the disposition of tosufloxacin enantiomers in man. *Eur. J. Clin. Pharmacol.*, **1993**, 45(5), 489-91.

Piddock, L.J.; Jin, Y.F.; Griggs, D.J. Effect of hydrophobicity and molecular mass on the accumulation of fluoroquinolones by *Staphylococcus aureus*. *J. Antimicrob. Chemother.*, **2001**, 47(3), 261-70.

Takenouchi, T.; Tabata, F.; Iwata, Y.; Hanzawa, H.; Sugawara, M.; Ohya, S. Hydrophilicity of quinolones is not an exclusive factor for decreased activity in efflux-mediated resistant mutants of *Staphylococcus aureus*. *Antimicrob. Agents Chemother.*, **1996**, 40(8), 1835-42.

Mitsuyama, J.; Itoh, Y.; Takahata, M.; Okamoto, S.; Yasuda, T. *In vitro* antibacterial activities of tosufloxacin against and uptake of tosufloxacin by outer membrane mutants of *Escherichia coli*, *Proteus mirabilis*, and *Salmonella typhimurium*. *Antimicrob. Agents Chemother.*, **1992**, 36(9), 2030-6.

Tanaka, M.; Yamazaki, E.; Chiba, M.; Yoshihara, K.; Akasaka, T.; Takemura, M.; Sato, K. *In vitro* antibacterial activities of DQ-113, a potent quinolone, against clinical isolates. *Antimicrob. Agents Chemother.*, **2002**, 46(3), 904-8.

Gargallo-Viola, D.; Ferrer, S.; Tudela, E.; Robert, M.; Coll, R.; Roser, R, Guinea J. Antibacterial activities and pharmacokinetics of E-4767 and E-5065, two new 8-chlorofluoroquinolones with a 7-azetidin ring substituent. *Antimicrob. Agents Chemother.*, **2001**, 45(11), 3113-21.

|               |                                                                                                                                                   |                                                                                                                                                                                                                                                                                                                                                                                                                                                                                                                                                                                                                                                                                                                                                                                                                                                                                                                                                                                                                                                                                                                                                                                                                                                                                                                                                                                                                                                          |
|---------------|---------------------------------------------------------------------------------------------------------------------------------------------------|----------------------------------------------------------------------------------------------------------------------------------------------------------------------------------------------------------------------------------------------------------------------------------------------------------------------------------------------------------------------------------------------------------------------------------------------------------------------------------------------------------------------------------------------------------------------------------------------------------------------------------------------------------------------------------------------------------------------------------------------------------------------------------------------------------------------------------------------------------------------------------------------------------------------------------------------------------------------------------------------------------------------------------------------------------------------------------------------------------------------------------------------------------------------------------------------------------------------------------------------------------------------------------------------------------------------------------------------------------------------------------------------------------------------------------------------------------|
|               |                                                                                                                                                   | <p>Neu, H.C.; Chin, N.X. <i>In vitro</i> activity of the new fluoroquinolone CP-99,219. <i>Antimicrob. Agents Chemother.</i>, <b>1994</b>, 38(11), 2615-22.</p> <p>Neu, H.C.; Fang, W.; Gu, J.W.; Chin, N.X. <i>In vitro</i> activity of OPC-17116. <i>Antimicrob. Agents Chemother.</i>, <b>1992</b>, 36(6), 1310-5.</p>                                                                                                                                                                                                                                                                                                                                                                                                                                                                                                                                                                                                                                                                                                                                                                                                                                                                                                                                                                                                                                                                                                                                |
| Trovafloxacin | <p>7-((1R,5S,6s)-6-amino-3-azabicyclo[3.1.0]hexan-3-yl)-1-(2,4-difluorophenyl)-6-fluoro-4-oxo-1,4-dihydro-1,8-naphthyridine-3-carboxylic acid</p> | <p>Lubasch, A.; Keller, I.; Borner, K.; Koeppe, P.; Lode, H. Comparative pharmacokinetics of ciprofloxacin, gatifloxacin, grepafloxacin, levofloxacin, trovafloxacin, and moxifloxacin after single oral administration in healthy volunteers. <i>Antimicrob. Agents Chemother.</i>, <b>2000</b>, 44(10), 2600-3.</p> <p>Andersson, M.I.; MacGowan, A.P. Development of the quinolones. <i>J Antimicrob Chemother.</i>, <b>2003</b>, 51(S1), 1-11.</p> <p>Dalvie, D.K.; Khosla, N.; Vincent, J. Excretion and metabolism of trovafloxacin in humans. <i>Drug Metab. Dispos.</i>, <b>1997</b>, 25(4), 423-7.</p> <p>Melnik, G.; Schwesinger, W.H.; Teng, R.; Dogolo, L.C.; Vincent, J. Hepatobiliary elimination of trovafloxacin and metabolites following single oral doses in healthy volunteers. <i>Eur. J. Clin. Microbiol. Infect. Dis.</i>, <b>1998</b>, 17(6), 424-6.</p> <p>Cormican, M.G.; Jones, R.N. Antimicrobial activity and spectrum of LB20304, a novel fluoronaphthyridone. <i>Antimicrob. Agents Chemother.</i>, <b>1997</b>, 41(1), 204-11.</p> <p>Goldstein, E.J.; Citron, D.M.; Hudspeth, M.; Hunt Gerardo, S.; Merriam, C.V. Trovafloxacin compared with levofloxacin, ofloxacin, ciprofloxacin, azithromycin and clarithromycin against unusual aerobic and anaerobic human and animal bite-wound pathogens. <i>J. Antimicrob. Chemother.</i>, <b>1998</b>, 41(3), 391-6.</p> <p>Brueggemann, A.B.; Kugler, K.C.; Doern, G.V.</p> |
|               |                                                                                                                                                   | <p><i>In vitro</i> activity of BAY 12-8039, a novel 8-methoxyquinolone,</p>                                                                                                                                                                                                                                                                                                                                                                                                                                                                                                                                                                                                                                                                                                                                                                                                                                                                                                                                                                                                                                                                                                                                                                                                                                                                                                                                                                              |

|  |  |                                                                                                                                                                                                                                                                                                                                                                                                                                                                                                                                                                                                                                                                                                                                                                                                                                                                                                                                                                                                                                                                                                                                                                                                                                                                                                                                                                                                                                                                                                                                                                                                                                                                                                                                                                                                                                                                                                                                                                                                                                      |
|--|--|--------------------------------------------------------------------------------------------------------------------------------------------------------------------------------------------------------------------------------------------------------------------------------------------------------------------------------------------------------------------------------------------------------------------------------------------------------------------------------------------------------------------------------------------------------------------------------------------------------------------------------------------------------------------------------------------------------------------------------------------------------------------------------------------------------------------------------------------------------------------------------------------------------------------------------------------------------------------------------------------------------------------------------------------------------------------------------------------------------------------------------------------------------------------------------------------------------------------------------------------------------------------------------------------------------------------------------------------------------------------------------------------------------------------------------------------------------------------------------------------------------------------------------------------------------------------------------------------------------------------------------------------------------------------------------------------------------------------------------------------------------------------------------------------------------------------------------------------------------------------------------------------------------------------------------------------------------------------------------------------------------------------------------------|
|  |  | <p>compared to activities of six fluoroquinolones against <i>Streptococcus pneumoniae</i>, <i>Haemophilus influenzae</i>, and <i>Moraxella catarrhalis</i>. <i>Antimicrob. Agents Chemother.</i>, <b>1997</b>, 41(7), 1594-7.</p> <p>Yun, H.J.; Min, Y.H.; Lim, J.A.; Kang, J.W.; Kim, S.Y.; Kim, M.J.; Jeong, J.H.; Choi, Y.J.; Kwon, H.J.; Jung, Y.H.; Shim, M.J.; Choi, E.C. <i>In vitro</i> and <i>in vivo</i> antibacterial activities of DW286, a new fluoronaphthyridone antibiotic. <i>Antimicrob. Agents Chemother.</i>, <b>2002</b>, 46(9), 3071-4.</p> <p>Hoellman, D.B.; Kelly, L.M.; Jacobs, M.R.; Appelbaum, P.C. Comparative antianaerobic activity of BMS 284756. <i>Antimicrob. Agents Chemother.</i>, <b>2001</b>, 45(2), 589-92.</p> <p>Montanari, M.P.; Mingoia, M.; Varaldo, P.E. <i>In vitro</i> antibacterial activities of AF 3013, the active metabolite of prulifloxacin, against nosocomial and community Italian isolates. <i>Antimicrob. Agents Chemother.</i>, <b>2001</b>, 45(12), 3616-22.</p> <p>Neu, H.C.; Chin, N.X. <i>In vitro</i> activity of the new fluoroquinolone CP-99,219. <i>Antimicrob. Agents Chemother.</i>, <b>1994</b>, 38(11), 2615-22.</p> <p>Snydman, D.R.; Jacobus, N.V.; McDermott, L.A.; Ruthazer, R.; Goldstein, E.; Finegold, S.; Harrell, L.; Hecht, D.W.; Jenkins, S.; Pierson, C.; Venezia, R.; Rihs, J.; Gorbach, S.L. <i>In vitro</i> activities of newer quinolones against bacteroides group organisms. <i>Antimicrob. Agents Chemother.</i>, <b>2002</b>, 46(10), 3276-9.</p> <p>Milatovic, D.; Schmitz, F.J.; Brisse, S.; Verhoef, J.; Fluit, A.C. <i>In vitro</i> activities of sitafloxacin (DU-6859a) and six other fluoroquinolones against 8,796 clinical bacterial isolates. <i>Antimicrob. Agents Chemother.</i>, <b>2000</b>, 44(4), 1102-7.</p> <p>Almer, L.S.; Hoffrage, J.B.; Keller, E.L.; Flamm, R.K.; Shortridge, V.D. <i>In vitro</i> and bactericidal activities of ABT-492, a novel fluoroquinolone, against Gram-positive and Gram-negative</p> |
|  |  |                                                                                                                                                                                                                                                                                                                                                                                                                                                                                                                                                                                                                                                                                                                                                                                                                                                                                                                                                                                                                                                                                                                                                                                                                                                                                                                                                                                                                                                                                                                                                                                                                                                                                                                                                                                                                                                                                                                                                                                                                                      |

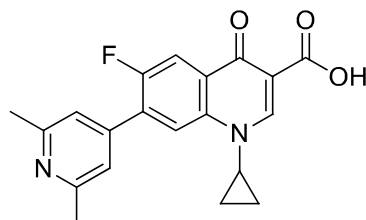

organisms. *Antimicrob. Agents Chemother.*, **2004**, 48(7), 2771-7.

Nilius, A.M.; Shen, L.L.; Hensey-Rudloff, D.; Almer, L.S.; Beyer, J.M.; Balli, D.J.; Cai, Y.; Flamm, R.K. *In vitro* antibacterial potency and spectrum of ABT-492, a new fluoroquinolone. *Antimicrob. Agents Chemother.*, **2003**, 47(10), 3260-9.

Jones, R.N.; Croco, M.A.; Pfaller, M.A.; Beach, M.L.; Kugler, K.C. Antimicrobial activity evaluations of gatifloxacin, a new fluoroquinolone: contemporary pathogen results from a global antimicrobial resistance surveillance program (SENTRY, 1997). *Clin. Microbiol. Infect.*, **1999**, 5(9), 540-6.

Felmingham, D.; Robbins, M.J.; Ingley, K.; Mathias, I.; Bhogal, H.; Leakey, A.; Ridgway, G.L.; Grüneberg, R.N. *In vitro* activity of trovafloxacin, a new fluoroquinolone, against recent clinical isolates. *J. Antimicrob. Chemother.*, **1997**, 39(SB), 43-9.

Cunha, B.A.; Qadri, S.M.; Ueno, Y.; Walters, E.A.; Domenico, P.

Antibacterial activity of trovafloxacin against nosocomial Gram-positive and Gram-negative isolates. *J. Antimicrob. Chemother.*, **1997**, 39(SB), 29-34.

Endtz, H.P.; Mouton, J.W.; den Hollander, J.G.; van den Braak, N.; Verbrugh, H.A. Comparative *in vitro* activities of trovafloxacin (CP-99,219) against 445 gram-positive isolates from patients with endocarditis and those with other bloodstream infections.

*Antimicrob. Agents Chemother.*, **1997**, 41(5), 1146-9.

Barry, A.L.; Fuchs, P.C.; Brown, S.D. *In vitro* activities of three nonfluorinated quinolones against representative

|          |                                                                                                         |                                                                                                                                                                                                                                                                                                                                                                                                                                                                                                                                                                                                                                                                                                                                                                                                                                                                                                                                                                                            |
|----------|---------------------------------------------------------------------------------------------------------|--------------------------------------------------------------------------------------------------------------------------------------------------------------------------------------------------------------------------------------------------------------------------------------------------------------------------------------------------------------------------------------------------------------------------------------------------------------------------------------------------------------------------------------------------------------------------------------------------------------------------------------------------------------------------------------------------------------------------------------------------------------------------------------------------------------------------------------------------------------------------------------------------------------------------------------------------------------------------------------------|
|          |                                                                                                         | <p>bacterial isolates. <i>Antimicrob. Agents Chemother.</i>, <b>2001</b>, 45(6), 1923-7.</p> <p>Gooding, B.B.; Jones, R.N. <i>In vitro</i> antimicrobial activity of CP-99,219, a novel azabicyclo-naphthyridone. <i>Antimicrob. Agents Chemother.</i>, <b>1993</b>, 37(2), 349-53.</p>                                                                                                                                                                                                                                                                                                                                                                                                                                                                                                                                                                                                                                                                                                    |
| WIN57273 | <p>1-cyclopropyl-7-(2,6-dimethylpyridin-4-yl)-6-fluoro-4-oxo-1,4-dihydroquinoline-3-carboxylic acid</p> | <p>Michéa-Hamzehpour, M.; Furet, Y.X.; Pechère, J.C. Role of protein D2 and lipopolysaccharide in diffusion of quinolones through the outer membrane of <i>Pseudomonas aeruginosa</i>. <i>Antimicrob. Agents Chemother.</i>, <b>1991</b>, 35(10), 2091-7.</p> <p>Eliopoulos, G.M.; Klimm, K.; Rice, L.B.; Ferraro, M.J.; Moellering, R.C. Jr. Comparative <i>in vitro</i> activity of WIN 57273, a new fluoroquinolone antimicrobial agent. <i>Antimicrob. Agents Chemother.</i>, <b>1990</b>, 34(6), 1154-1159.</p> <p>Jones, R.N.; Barry, A.L. <i>In vitro</i> evaluation of WIN 57273, a new broad-spectrum fluoroquinolone. <i>Antimicrob. Agents Chemother.</i>, <b>1990</b>, 34(2), 306-13.</p> <p>Sedlock, D.M.; Dobson, R.A.; Deuel, D.M.; Leshner, G.Y.; Rake, J.B. <i>In vitro</i> and <i>in vivo</i> activities of a new quinolone, WIN 57273, possessing potent activity against gram-positive bacteria. <i>Antimicrob. Agents Chemother.</i>, <b>1990</b>, 34(4), 568-75.</p> |
