# Supplementary material for: New Pharmacokinetic and Microbiological Prediction Equations to Be Used as Models for the Search of Antibacterial Drugs
Source: MDPI journal article supplement (doi:10.3390/ph15020122), 2022-01-20
Supplement: s1 [file s1]

# New Pharmacokinetic and Microbiological Prediction Equations to Be Used as Models for the Search of Antibacterial Drugs

Jose I. Bueso-Bordils <sup>1,\*</sup>, Gerardo M. Antón-Fos <sup>1</sup>, Antonio Falcó <sup>2</sup>, Maria J. Duart <sup>1</sup>, Rafael Martín-Algarra <sup>1</sup> and Pedro A. Alemán-López <sup>1</sup>

<sup>1</sup> Departamento de Farmacia, Universidad Cardenal Herrera-CEU, CEU Universities C/Ramón y Cajal s/n, Alfara del Patriarca, 46115 Valencia, Spain; ganton@uchceu.es (G.M.A.-F.); mduart@uchceu.es (M.J.D.); rmartin@uchceu.es (R.M.-A.); paleman@uchceu.es (P.A.A.-L.)

<sup>2</sup> ESI International Chair@CEU-UCH, Departamento de Matemáticas, Física y Ciencias Tecnológicas, Universidad Cardenal Herrera-CEU, CEU Universities San Bartolomé 55, Alfara del Patriarca, 46115 Valencia, Spain; afalco@uchceu.es

\* Correspondence: jose.bueso@uchceu.es; Tel.: +34-96-136-9000

## Supplementary Section S4: Symbols and Definitions of Topological Indices used with DESMOL13<sup>a</sup> and MOLCONN-Z<sup>b</sup> programs.

| Symbol                                   | Name                                                                                       | Definition                                                                                                                                                                                                                                                                                                                                                            | Ref. |
|------------------------------------------|--------------------------------------------------------------------------------------------|-----------------------------------------------------------------------------------------------------------------------------------------------------------------------------------------------------------------------------------------------------------------------------------------------------------------------------------------------------------------------|------|
| <b>Connectivity Indices</b>              |                                                                                            |                                                                                                                                                                                                                                                                                                                                                                       |      |
| ${}^k\chi_t$<br>$k=0-10$<br>$t=p,c,pc$   | Kier-Hall indices of order $k$ and type path (p), cluster (c) and path-cluster (pc)        | ${}^k\chi_t = \sum_{j=1}^{n_t} \left( \prod_{i \in S_j} \delta_i \right)^{-1/2}$<br>$\delta_i$ : number of bonds, $\sigma$ or $\pi$ , of the atom $i$ to non-hydrogen atoms.<br>$S_j$ : $j$ th substructure of order $k$ and type $t$ .                                                                                                                               | c    |
| ${}^k\chi_t^v$<br>$k=0-10$<br>$t=p,c,pc$ | Kier-Hall indices of order $k$ and type path (p), cluster (c) and path-cluster (pc)        | ${}^k\chi_t^v = \sum_{j=1}^{n_t} \left( \prod_{i \in S_j} \delta_i^v \right)^{-1/2}$<br>$\delta_i^v$ : Kier-Hall valence of the atom $i$ .<br>$S_j$ : $j$ th substructure of order $k$ and type $t$ .                                                                                                                                                                 | b    |
| ${}^kD_t$<br>$k=0-10$<br>$t=p,c,pc$      | Connectivity differences of order $k$ and type path (p), cluster (c) and path-cluster (pc) | ${}^kD_t = {}^k\chi_t - {}^k\chi_t^v$                                                                                                                                                                                                                                                                                                                                 | b    |
| ${}^kC_t$<br>$k=0-10$<br>$t=p,c,pc$      | Connectivity ratios of order $k$ and type path (p), cluster (c) and path-cluster (pc)      | ${}^kC_t = {}^k\chi_t / {}^k\chi_t^v$                                                                                                                                                                                                                                                                                                                                 | b    |
| <b>Charge Indices</b>                    |                                                                                            |                                                                                                                                                                                                                                                                                                                                                                       |      |
| $G_k$<br>$k=1-5$                         | Topological charge indices of order $k$                                                    | $G_k = \sum_{i=1}^{N-1} \sum_{j=i+1}^N  \mathbf{M}_{ij} - \mathbf{M}_{ji}  \delta(k, \mathbf{D}_{ij})$<br>$\mathbf{M}=\mathbf{A} \cdot \mathbf{Q}$ : product of the adjacency and inverse squared distance matrices for the hydrogen-depleted molecular graph.<br>$\mathbf{D}$ : distance matrix.<br>$\delta$ : Kronecker delta.                                      | d    |
| $G_k^v$<br>$k=1-5$                       | Valence topological charge indices of order $k$                                            | $G_k^v = \sum_{i=1}^{N-1} \sum_{j=i+1}^N  \mathbf{M}_{ij}^v - \mathbf{M}_{ji}^v  \delta(k, \mathbf{D}_{ij})$<br>$\mathbf{M}^v=\mathbf{A}^v \cdot \mathbf{Q}$ : product of the electronegativity-modified adjacency and inverse squared distance matrices for the hydrogen-depleted molecular graph.<br>$\mathbf{D}$ : distance matrix.<br>$\delta$ : Kronecker delta. | d    |
| $J_k, J_k^v$<br>$k=1-5$                  | Pondered topological charge indices of order $k$                                           | $J_k = \frac{G_k}{N-1} \quad J_k^v = \frac{G_k^v}{N-1}$                                                                                                                                                                                                                                                                                                               | d    |
| <b>Electrotopological Indices</b>        |                                                                                            |                                                                                                                                                                                                                                                                                                                                                                       |      |
| $S(i)$                                   | Sum of electrotopological indices for a type of atom $i$                                   | $S_i = I_i + \Delta I_i$<br>$I_i$ : intrinsic state value of atom $i$ .<br>$\Delta I_i$ : perturbation of $I_j$ on $I_i$ with the form as $\Delta I_{ij} = (I_i - I_j)/D_{ij}^2$                                                                                                                                                                                      | e    |
| Gmaxpos                                  | Gmaxpos index                                                                              | Maximum positive value for the electrotopological state of non-hydrogen atoms in the molecule.                                                                                                                                                                                                                                                                        | f    |
| Hmaxpos                                  | Hmaxpos index                                                                              | Maximum positive value for the electrotopological state of hydrogen atoms in the molecule.                                                                                                                                                                                                                                                                            | c    |
| <b>Molecular Properties</b>              |                                                                                            |                                                                                                                                                                                                                                                                                                                                                                       |      |
| N                                        | Molecular size                                                                             | Number of non-hydrogen atoms.                                                                                                                                                                                                                                                                                                                                         | g    |

|                                   |                                             |                                                                                                                                                                                                                                                                                                                                                                                                                                                                                                                                                                    |   |
|-----------------------------------|---------------------------------------------|--------------------------------------------------------------------------------------------------------------------------------------------------------------------------------------------------------------------------------------------------------------------------------------------------------------------------------------------------------------------------------------------------------------------------------------------------------------------------------------------------------------------------------------------------------------------|---|
| L                                 | Length                                      | Maximum distance between atoms in terms of bonds.                                                                                                                                                                                                                                                                                                                                                                                                                                                                                                                  | h |
| PR <sub>i</sub>                   | PR0 a PR3                                   | Number of pairs of ramifications separated by <i>i</i> atoms.                                                                                                                                                                                                                                                                                                                                                                                                                                                                                                      | f |
| R                                 | Ramification                                | Number of simple structural branches.                                                                                                                                                                                                                                                                                                                                                                                                                                                                                                                              | f |
| V <sub>k</sub><br>k=3,4           | Vertexes of grade <i>k</i>                  | Number of atoms with <i>k</i> bonds, $\sigma$ or $\pi$ , with other atoms (hydrogens not included).                                                                                                                                                                                                                                                                                                                                                                                                                                                                | f |
| knotp                             | knotp index                                 | Difference between ${}^3\chi_c$ and ${}^4\chi_{pc}$ indices                                                                                                                                                                                                                                                                                                                                                                                                                                                                                                        | i |
| knotpv                            | knotpv index                                | Difference between ${}^3\chi^v_c$ and ${}^4\chi^v_{pc}$ indices                                                                                                                                                                                                                                                                                                                                                                                                                                                                                                    | h |
| numhbd                            | numhbd index                                | Number of hydrogen-donating atoms in the molecule.                                                                                                                                                                                                                                                                                                                                                                                                                                                                                                                 | h |
| numhba                            | numhbd index                                | Number of hydrogen-accepting atoms in the molecule.                                                                                                                                                                                                                                                                                                                                                                                                                                                                                                                | h |
| <b>Information Indices</b>        |                                             |                                                                                                                                                                                                                                                                                                                                                                                                                                                                                                                                                                    |   |
| I <sub>Shannon</sub>              | Shannon index                               | Index based on the atomic diversity of the molecule.                                                                                                                                                                                                                                                                                                                                                                                                                                                                                                               | g |
| NI, NI2                           | NI, NI2 indices                             | Indices based on information theory.                                                                                                                                                                                                                                                                                                                                                                                                                                                                                                                               | g |
| BonIdW                            | Bonchev IdW(G) index                        | Index based in the distribution of topological distances in the molecule.                                                                                                                                                                                                                                                                                                                                                                                                                                                                                          | j |
| BonIdG                            | Bonchev Id(G) index                         | Index based on the number of order 2 subgraphs in the molecule.                                                                                                                                                                                                                                                                                                                                                                                                                                                                                                    | i |
| <b>Molecular Shape Indices</b>    |                                             |                                                                                                                                                                                                                                                                                                                                                                                                                                                                                                                                                                    |   |
| ${}^n\kappa$<br>n=1-3             | Kappa index of order <i>n</i>               | ${}^1\kappa = N(N-1)^2/({}^1P)^2$<br>${}^2\kappa = (N-1)(N-2)^2/({}^2P)^2$<br>${}^3\kappa = (N-3)(N-2)^2/({}^3P)^2$ [N even; N>3]<br>${}^3\kappa = (N-1)(N-3)^2/({}^3P)^2$ [N odd; N>3]<br>N: number of non-hydrogen atoms.<br>${}^{1,2,3}P$ : number of type path subgraphs of order 1, 2, 3.                                                                                                                                                                                                                                                                     | k |
| ${}^n\kappa_\alpha$<br>n=1-3      | Kappa-alpha index of order <i>n</i>         | ${}^1\kappa = N+\alpha(N+\alpha-1)^2/({}^1P+\alpha)^2$<br>${}^2\kappa = (N+\alpha-1)(N+\alpha-2)^2/({}^2P+\alpha)^2$<br>${}^3\kappa = (N+\alpha-3)(N+\alpha-2)^2/({}^3P+\alpha)^2$ [N even; N>3]<br>${}^3\kappa = (N+\alpha-1)(N+\alpha-3)^2/({}^3P+\alpha)^2$ [N odd; N>3]<br>N: number of non-hydrogen atoms.<br>${}^{1,2,3}P$ : number of type path subgraphs of order 1, 2, 3.<br>$\alpha = \sum[(R_i / R_{Csp^3}) - 1]$<br>R <sub>i</sub> : covalent radius for atom <i>i</i> .<br>R <sub>Csp<sup>3</sup></sub> : covalent radius for atom Csp <sup>3</sup> . | l |
| $\Phi$                            | Phia flexibility index                      | $\Phi = ({}^1\kappa_\alpha \cdot {}^2\kappa_\alpha) / N$<br>N: number of non-hydrogen atoms.                                                                                                                                                                                                                                                                                                                                                                                                                                                                       | m |
| <b>Global Topological Indices</b> |                                             |                                                                                                                                                                                                                                                                                                                                                                                                                                                                                                                                                                    |   |
| Sum-I                             | Sum of the intrinsic state values           | $I_i = \frac{\delta_i^v + 1}{\delta_i}$ ; Sum - I = $\sum I_i$<br>$\delta_i$ , number of bonds, $\sigma$ o $\pi$ , of the atom <i>i</i> to non-hydrogen atoms.<br>$\delta_i^v$ , Kier-Hall valence of the atom <i>i</i> .                                                                                                                                                                                                                                                                                                                                          | e |
| Sum- $\Delta I$                   | Sum of the change in intrinsic state values | $\Delta I = \frac{I_i - I_j}{r_{ij}^2}$ ; Sum - $\Delta I = \sum \frac{I_i - I_j}{r_{ij}^2}$<br>r <sub>ij</sub> , number of vertexes between <i>i</i> and <i>j</i> atoms.                                                                                                                                                                                                                                                                                                                                                                                          | e |
| TETS2                             | Total electrotopological state index        | Sum of all the electrotopological indices in the molecule.                                                                                                                                                                                                                                                                                                                                                                                                                                                                                                         | e |
| TTd4                              | TTd4 index                                  | Sum of the intrinsic state of all the atoms in the molecule.                                                                                                                                                                                                                                                                                                                                                                                                                                                                                                       | e |
| nclass                            | Nclass index                                | Maximum number of topological vertices of a graph by the shortest path                                                                                                                                                                                                                                                                                                                                                                                                                                                                                             | n |

|        |                       |                                                                                                                                 |   |
|--------|-----------------------|---------------------------------------------------------------------------------------------------------------------------------|---|
| W      | Wiener index          | Sum of the topological distances between all the non-hydrogen atoms by the shortest path.                                       | o |
| Wp     | Wiener polarity index | Number of pairs of atoms with a distance of 3 bonds.                                                                            | p |
| Ww     | Hyper-Wiener index    | Sum of the topological distances and the squared topological distances between all the non-hydrogen atoms by the shortest path. | q |
| Wt     | Total Wiener index    | Sum of the topological distances between all the non-hydrogen atoms by the longest path.                                        | r |
| PlattF | PlattF index          | Sum of the grades of the bonds.                                                                                                 | s |

- a. DESMOL13 software; Unidad de Investigación de Diseño de Fármacos y Conectividad Molecular, Facultad de Farmacia, Universitat de València: Valencia, **2000**.
- b. Hall, L. H. MOLCONN-Z software; Eastern Nazarene College: Quincy (Massachusetts), **1995**.
- c. Kier, L.B.; Hall, L.H. General definition of valence delta-values for molecular connectivity. *J. Pharm. Sci.*, **1983**, 72(10), 1170-1173.
- d. Gálvez, J.; García-Domenech, R.; Salabert, M.T.; Soler, R. Charge indexes. New topological descriptors. *J. Chem. Inf. Comput. Sci.*, **1994**, 34(3), 520-525.
- e. Kier, L.B.; Hall, L.H. The E-state as an extended free valence. *J. Chem. Inf. Comput. Sci.*, **1997**, 37(3), 548-552.
- f. Basak, S.C.; Mills, D. Quantitative structure-property relationships (QSPRs) for the estimation of vapor pressure: a hierarchical approach using mathematical structural descriptors. *J. Chem. Inf. Comput. Sci.*, **2001**, 41(3), 692-701.
- g. Shannon, C.E.; Weaver, W. *The Mathematical Theory of Communication*; University of Illinois Press: Urbana, **1949**.
- h. Moliner, R.; García, F.; Galvez, J.; García-Domenech, R.; Serrano, C. Nuevos índices topológicos en conectividad molecular. Su aplicación a algunas propiedades fisicoquímicas de un grupo de hidrocarburos alifáticos. *An. Real Acad. Farm.*, **1991**, 57, 287-298.
- i. Cummins, D.J.; Andrews, C.W.; Bentley, J.A.; Cory, M. Molecular diversity in chemical databases: comparison of medicinal chemistry knowledge bases and databases of commercially available compounds. *J. Chem. Inf. Comput. Sci.*, **1996**, 36(4), 750-763.
- j. Bonchev, D.; Trinajstić, N. On topological characterization of molecular branching. *Int. J. Quantum Chem.*, **1978**, 14(S12), 293-303.
- k. Kier, L.B. A shape index from molecular graphs. *Quant. Struct.-Act. Relat.*, **1985**, 4(3), 109-116.
- l. Kier, L.B. Distinguishing atom differences in a molecular graph shape index. *Quant. Struct.-Act. Relat.*, **1986**, 5(1), 7-12.
- m. Kier, L.B. An index of molecular flexibility from Kappa shape attributes. *Quant. Struct.-Act. Relat.*, **1989**, 8(3), 221-224.
- n. Suay-García, B.; Alemán-López, P.; Bueso-Bordils, J.I.; Falcó, A.; Pérez-Gracia, M.T.; Antón-Fos, G.M. Topological index Nclass as a factor determining the antibacterial activity of quinolones against *Escherichia coli*. *Future Med. Chem.* **2019**, 11(17), 2255-2262.
- o. Wiener, H. Structural determination of paraffin boiling points. *J. Am. Chem. Soc.*, **1947**, 69(1), 17-20.
- p. Wiener, H. Relation of the physical properties of the isomeric alkanes to molecular structure. Surface tension, specific dispersion, and critical solution temperature in aniline. *J. Phys. Chem.*, **1948**, 52(6), 1082-1089.
- q. Randić, M.; Guo, X.; Oxley, T.; Krishnapriyan, H.; Naylor, L. Wiener matrix invariants. *J. Chem. Inf. Comput. Sci.*, **1994**, 34(2), 361-367.
- r. Niederfellner, J.; Lenoir, D.; Matuschek, G.; Rehfeldt, F.; Utschick, H.; Brügemann, R. Description of vapor pressures of polycyclic aromatic compounds by graph theoretical indices. *Quant. Struct.-Act. Relat.*, **1997**, 16(1), 38-48.
- s. Platt, J.R. Influence of neighbor bonds on additive bond properties in paraffins. *J. Chem. Phys.*, **1947**, 15(6), 419-420.
